# Supplementary material
Source: PubMed Central journal article supplement (PMC4856055)
Supplement: NIHMS775520-supplement-Suppl_Info.pdf [file NIHMS775520-supplement-Suppl_Info.pdf]

## Supporting Information

### **[<sup>18</sup>F]Fluorobenzoyl-Lysine-Pentanedioic Acid Carbamates: Novel PET Imaging Agents for the Prostate-Specific Membrane Antigen**

Xing Yang, Ronnie C. Mease, Mrudula Pullambhatla, Ala Lisok, Ying Chen, Catherine A. Foss, Hassan Shallal, Hannah Edelman, Adam T. Hoye, Giorgio Attardo, Sridhar Nimmagadda, Martin G. Pomper

#### Table of Contents

|                                                                                                                                                                                                                                                                                                     |     |
|-----------------------------------------------------------------------------------------------------------------------------------------------------------------------------------------------------------------------------------------------------------------------------------------------------|-----|
| 1. Radiosynthesis of [ <sup>125</sup> I] <b>31</b> and [ <sup>125</sup> I] <b>32</b>                                                                                                                                                                                                                | S2  |
| 2. Figure S1. Radio-thin layer Chromatography of in-vitro Metabolism of [ <sup>125</sup> I] <b>31</b> and [ <sup>125</sup> I] <b>32</b>                                                                                                                                                             | S3  |
| 3. Table S1. Radiofluorination conditions for 2-[ <sup>18</sup> F]fluoro-bromobenzaldehyde                                                                                                                                                                                                          | S4  |
| 4. Radiosynthesis of (S)-2-((((S)-1-carboxy-5-(4-[ <sup>18</sup> F]fluorobenzamido)pentyl)oxy)carbonyl)amino)pentanedioic acid [ <sup>18</sup> F] <b>12</b> and (S)-2-((((S)-1-carboxy-5-(4-[ <sup>18</sup> F]fluorobenzamido)pentyl)carbamoyl)oxy)pentanedioic acid [ <sup>18</sup> F] <b>13</b> . | S5  |
| 5. Synthesis of N-succinimidyl 4-bromo and 4-iodo-2-fluorobenzoate                                                                                                                                                                                                                                  | S6  |
| 6. Figure S2. Preparative Radio-HPLC trace of 2-[ <sup>18</sup> F]fluoro-4-bromobenzaldehyde [ <sup>18</sup> F] <b>29b</b> .                                                                                                                                                                        | S6  |
| 7. Figure S3. Preparative Radio-HPLC trace of N-succinimidyl 2-[ <sup>18</sup> F]fluoro-4-bromobenzoate [ <sup>18</sup> F] <b>30b</b>                                                                                                                                                               | S7  |
| 8. Figure 4. Preparative Radio-HPLC Trace of (S)-2-((((S)-5-(4-bromo-2-[ <sup>18</sup> F]fluorobenzamido)-1-carboxypentyl)carbamoyl)oxy)pentanedioic acid [ <sup>18</sup> F] <b>23</b> .                                                                                                            | S7  |
| 9. Figure S5. Quality control analytical radio-HPLC trace of purified (S)-2-((((S)-5-(4-bromo-2-[ <sup>18</sup> F]fluorobenzamido)-1-carboxypentyl)carbamoyl)oxy)pentanedioic acid [ <sup>18</sup> F] <b>23</b> .                                                                                   | S8  |
| 10. Figure S6. Preparative Radio-HPLC trace of 2-[ <sup>18</sup> F]fluoro-4-iodobenzaldehyde [ <sup>18</sup> F] <b>29c</b> .                                                                                                                                                                        | S8  |
| 10. Figure S7. Preparative Radio-HPLC trace of N-succinimidyl 2-[ <sup>18</sup> F]fluoro-4-iodobenzoate [ <sup>18</sup> F] <b>30c</b> .                                                                                                                                                             | S9  |
| 11. Figure S8. Preparative Radio-HPLC Trace of (S)-2-((((S)-5-(4-iodo-2-[ <sup>18</sup> F]fluorobenzamido)-1-carboxypentyl)carbamoyl)oxy)pentanedioic acid [ <sup>18</sup> F] <b>24</b> .                                                                                                           | S9  |
| 12. Figure S9. Quality control analytical radio-HPLC trace of purified (S)-2-((((S)-5-(4-iodo-2-[ <sup>18</sup> F]fluorobenzamido)-1-carboxypentyl)carbamoyl)oxy)pentanedioic acid [ <sup>18</sup> F] <b>24</b> .                                                                                   | S10 |



### In-vitro metabolism of [<sup>125</sup>I]31 and [<sup>125</sup>I]32 in PC-3 PIP (PSMA+) and PC-3 flu (PSMA-) cells

PC-3 PIP (PSMA+) and PC-3 flu (PSMA-) cells were cultured as previously described (2). 300,000 PIP or flu cells were seeded into three wells each of a 6 well plate using RPMI 1640 + 10% fetal bovine serum + 1 % Penicillin-Streptomycin (Corning Cellgro, Manassas, VA) and were grown to 80% confluency. At the time of assay, the culture medium was refreshed and 50 μCi (1.35 kBq) of [<sup>125</sup>I]31 or [<sup>125</sup>I]32 was added to both a PIP- and flu-containing well. After radiotracer addition, the plate was returned to the incubator (humidified 37° C, 5% CO<sub>2</sub>) for 30 minutes. The medium was then carefully removed and saved for counting in a LKB Wallac 1282 Compugamma gamma counter (Mount Waverly, Vic, Australia). The cells were washed twice with ambient temperature PBS, pH 7.4 followed by the addition of ddH<sub>2</sub>O to lyse the cells. Lysis took place over 30 minutes inside the incubator. The lysates were then collected and counted using the gamma counter. Equal amounts of radioactivity from the supernatant and lysates were spotted onto silica gel 60 RP-18 F254S glass TLC plates (EMD Millipore Corp., Billerica, MA) and the plates were developed using a mobile phase consisting of 55% acetonitrile, 45% water and 0.1% trifluoroacetic acid. The TLC plate was dried and exposed to Kodak Biomax x-ray film (Fisher Scientific) prior to digitizing using the MCID Core package (Interfocus Imaging, Cambridge, UK). Standards solutions of [<sup>125</sup>I]31 and [<sup>125</sup>I]32 had R<sub>f</sub> values of 0.8. Intracellular and extracellular metabolites of [<sup>125</sup>I]31 in PC-3 PIP cells had an R<sub>f</sub> value of approximately 0.44.

Figure S2. TLC analysis of Metabolism of [<sup>125</sup>I]31 and [<sup>125</sup>I]32 in PC 3 PIP (PSMA+) and PC3 flu (PSMA-) cells.

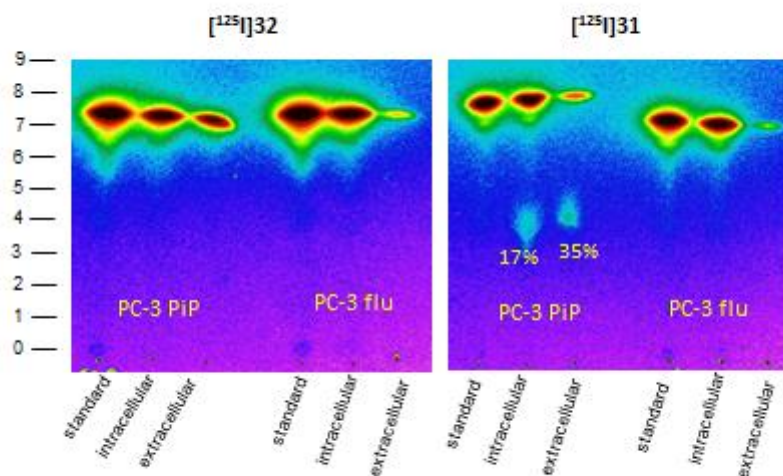

**Radiofluorination conditions for the preparation of 2-[<sup>18</sup>F]fluoro-4-bromobenzaldehyde**

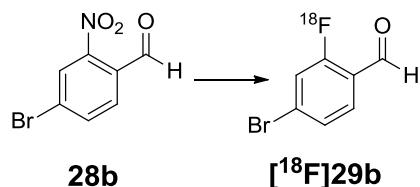

<sup>18</sup>F-Fluoride was produced by a General Electric PETtrace biomedical cyclotron (GE HealthCare) using 18MeV proton bombardment on an <sup>18</sup>O-H<sub>2</sub>O target and trapped on a Chromafix 30-PS-HCO<sub>3</sub> QMA cartridge. The cartridge was eluted with 0.5mL of a solution of potassium carbonate or potassium bicarbonate(4.5mg/0.5mL) into a 3mL Wheaton reaction vial. To this was added 15-18 mg 4,7,13,16,21,24-hexaoxa-1,10-diazabicyclo[8.8.8]hexacosane (K<sub>2.2.2</sub>) in 1mL of acetonitrile and heated to 100 °C under a stream of Argon gas to dryness. Further drying was accomplished by azeotropic distillation using 3 × 0.5 mL additions of acetonitrile. The vial is cooled to room temperature and a solution of 8-16 mg 4-bromo-2-nitrobenzaldehyde (**28b**) in 250 μL DMSO or acetonitrile is added and heated at various temperatures for 5-20 min then cooled to room temperature and diluted to a volume of 2 mL with 25% acetonitrile/water for purification by radio-HPLC (10 × 250 mm Phenomenex Luna C18 column, 54/46/0.1 water/acetonitrile/TFA, 4 mL/m). 4-bromo-2-[<sup>18</sup>F]fluorobenzaldehyde (**[<sup>18</sup>F]29b**) eluted at 18.5 min. Results are given in Table S1 below.

**Table S1.** Radiofluorination Conditions for 4-bromo-2-[<sup>18</sup>F]fluorobenzaldehyde (**29b**)

| Entry | Solvent | Temp °C          | Base                           | Reaction time | % yield <sup>a</sup> |
|-------|---------|------------------|--------------------------------|---------------|----------------------|
| 1     | DMSO    | rt               | K <sub>2</sub> CO <sub>3</sub> | 5 min         | 6                    |
| 2     | DMSO    | 65               | K <sub>2</sub> CO <sub>3</sub> | 5 min         | 6                    |
| 3     | DMSO    | 65               | K <sub>2</sub> CO <sub>3</sub> | 20 min        | 7                    |
| 4     | DMSO    | 100              | K <sub>2</sub> CO <sub>3</sub> | 5 min         | 15                   |
| 5     | DMSO    | 100              | K <sub>2</sub> CO <sub>3</sub> | 15 min        | 13                   |
| 6     | MeCN    | 100              | K <sub>2</sub> CO <sub>3</sub> | 5 min         | 4                    |
| 7     | DMSO    | 140              | K <sub>2</sub> CO <sub>3</sub> | 20 min        | 12                   |
| 8     | DMSO    | 140 <sup>b</sup> | K <sub>2</sub> CO <sub>3</sub> | 5min          | 0                    |
| 9     | DMSO    | 95               | KHCO <sub>3</sub>              | 5 min         | 22                   |
| 10    | DMSO    | 95               | KHCO <sub>3</sub>              | 20 min        | 30                   |
| 11    | DMSO    | 120              | KHCO <sub>3</sub>              | 20 min        | 50                   |
| 12    | DMSO    | 140              | KHCO <sub>3</sub>              | 20 min        | 32                   |
| 13    | DMSO    | 140              | KHCO <sub>3</sub>              | 20 min        | 33                   |
| 14    | DMSO    | 140 <sup>b</sup> | KHCO <sub>3</sub>              | 10 min        | 30                   |

<sup>a</sup> non-decay corrected <sup>b</sup>microwave



collected, neutralized with sodium bicarbonate, concentrated under vacuum, and dissolved in sterile saline for injection. The non-decayed corrected radiochemical yield from [ $^{18}\text{F}$ ]SFB was 5%.

#### N-Succinimidyl 4-bromo/iodo-2-fluorobenzoate:

4-bromo-2-fluorobenzoic acid (or 4-iodo-2-fluorobenzoic acid) 1 mmol and N-hydroxysuccinimide 125 mg (1.08 mmol) were dissolved in 2 mL dry DMF. To the solution, N,N-dicyclohexylcarbodiimide 170  $\mu\text{L}$  (1.10 mmol) was added and the reaction was kept at room temperature overnight. After a flash column chromatography with ethyl acetate/hexane, 1:1, the N-succinimidyl 4-bromo/4-iodo-2-fluorobenzoates were obtained as white solids. TLC: silica gel, 1:1 ethylacetate:hexane. N-succinimidyl 4-bromo-2-fluorobenzoate (205mg) was obtained in a yield of 65%;  $R_f = 0.6$ . N-succinimidyl 4-iodo-2-fluorobenzoate (330mg) was obtained in a yield of 52%;  $R_f = 0.6$ .

N-Succinimidyl 4-bromo-2-fluorobenzoate:

$^1\text{H-NMR}$  (500 MHz,  $\text{CDCl}_3$ ):  $\delta$  7.97-7.94 (m, 1H), 7.48-7.44 (m, 2H), 2.92 (s, 4H).

N-Succinimidyl 4-iodo-2-fluorobenzoate

$^1\text{H-NMR}$  (500 MHz,  $\text{CDCl}_3$ ):  $\delta$  7.78-7.75 (m, 1H), 7.68-7.64 (m, 2H), 2.92 (s, 4H).

Figure S2. Preparative Radio-HPLC chromatogram of 2- $^{18}\text{F}$ fluoro-4-bromo-benzaldehyde ( $^{18}\text{F}$ 29b. 10 X 250mm, 10 micron Phenomenex Luna C18 column, 54/46/0.1 water/acetonitrile/TFA, 4mL/m. Double radioactive peak @ 18-19.5 min is due to saturation of the radioactivity detector.

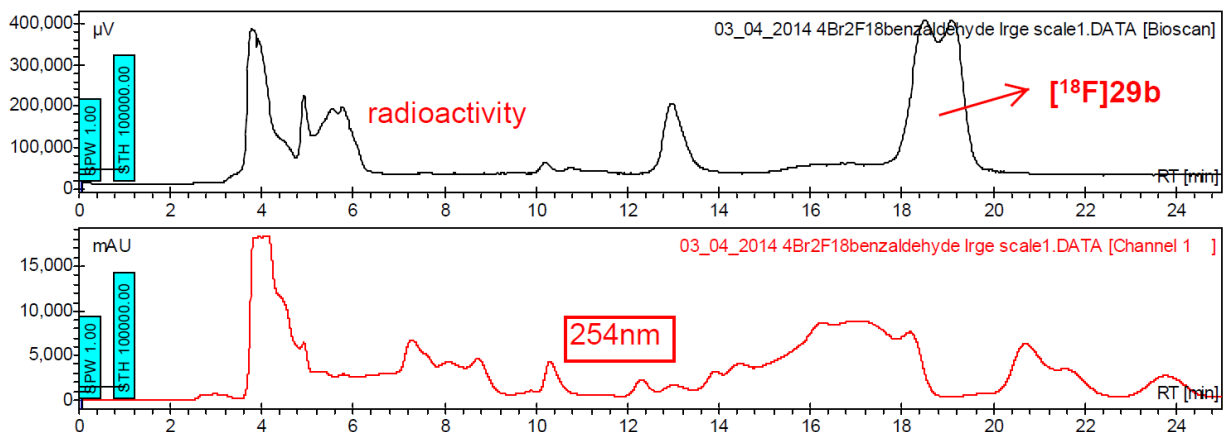

Figure S3. Preparative Radio-HPLC chromatogram of N-succinimidyl 2-[<sup>18</sup>F]fluoro-4-bromobenzoate (**[<sup>18</sup>F]30b**). 10 X 250mm, 10 micron Phenomenex Luna C18 column, 50/50/0.1 water/acetonitrile/TFA, 4mL/m.

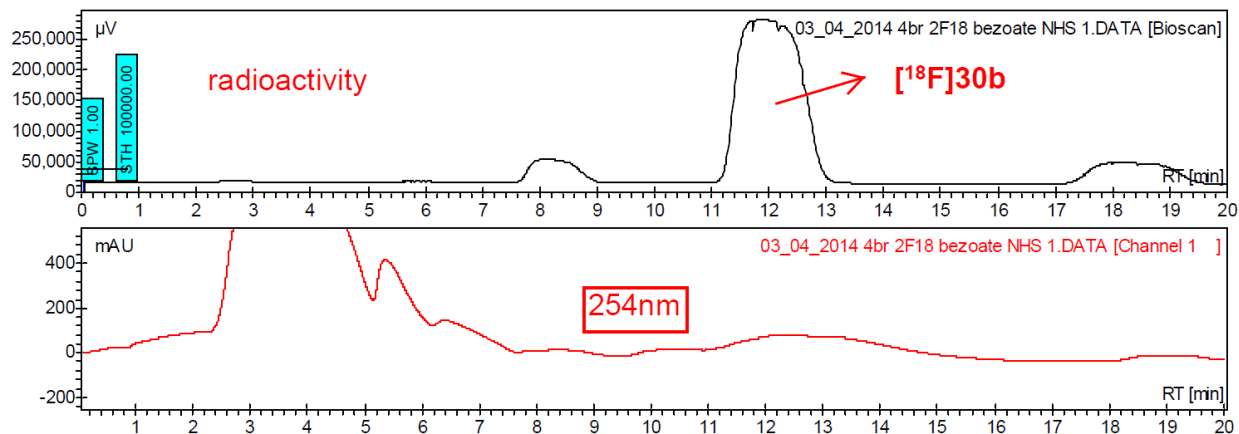

Figure S4. Preparative Radio-HPLC chromatogram of (S)-2-(((S)-5-(4-bromo-2-[<sup>18</sup>F]fluorobenzamido)-1-carboxypentyl)carbamoyloxy)pentanedioic acid (**[<sup>18</sup>F]23**). 10 X 250mm, 10 micron Phenomenex Luna C18 column, 70/30/0.1 water/acetonitrile/TFA, 4mL/m.

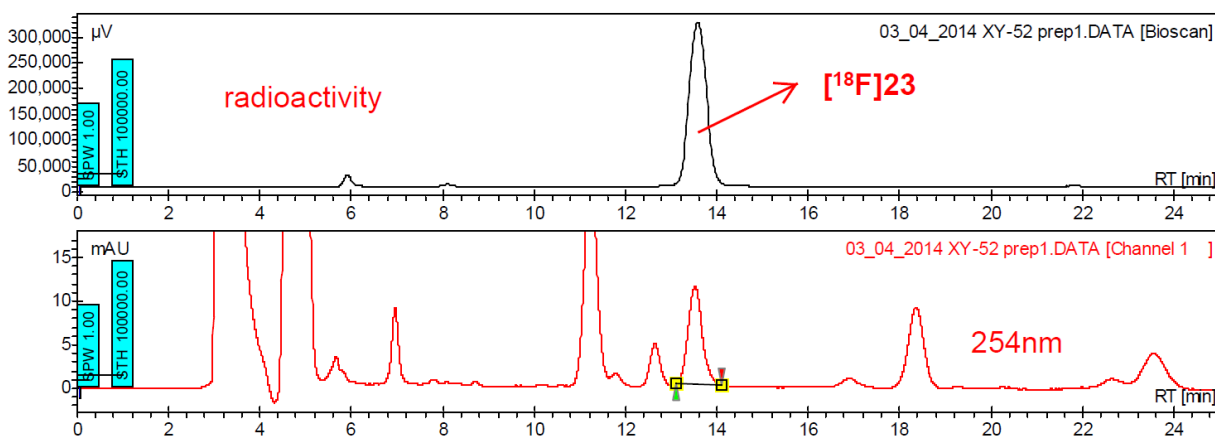

Figure S5. Quality control analytical radio-HPLC chromatogram of purified (S)-2-(((S)-5-(4-bromo-2-[<sup>18</sup>F]fluorobenzamido)-1-carboxypentyl)carbamoyloxy)pentanedioic acid ([<sup>18</sup>F]**23**). 4.6 X 150mm, 10 micron Phenomenex Luna C18 column, 70/30/0.1 water/acetonitrile/TFA, 1mL/m.

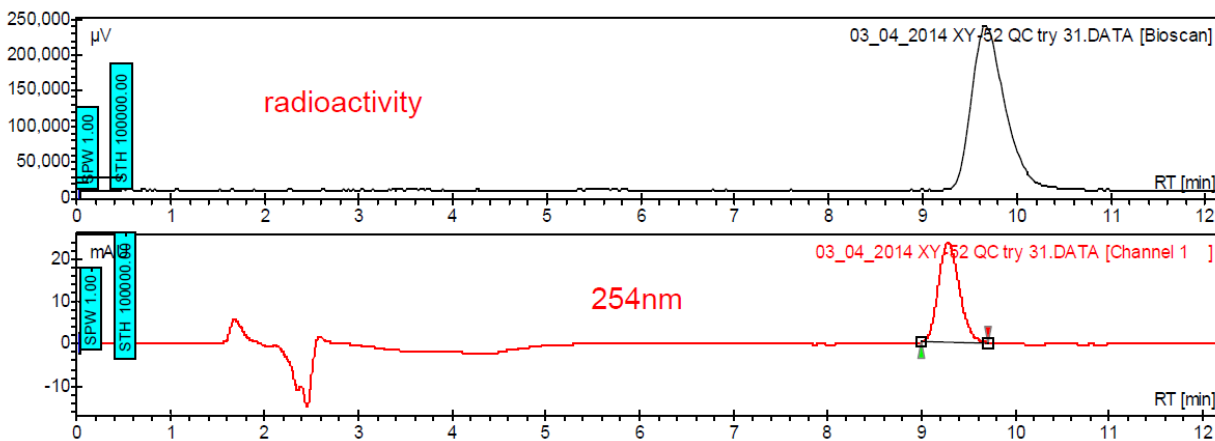

Figure S6. Preparative Radio-HPLC chromatogram of 2-[<sup>18</sup>F]fluoro-4-iodo-benzaldehyde ([<sup>18</sup>F]**29c**). 10 X 250mm, 10 micron Phenomenex Luna C18 column, 54/46/0.1 water/acetonitrile/TFA, 4mL/m. Double radioactive peak @ 21-23 minutes is due to saturation of the radioactivity detector.

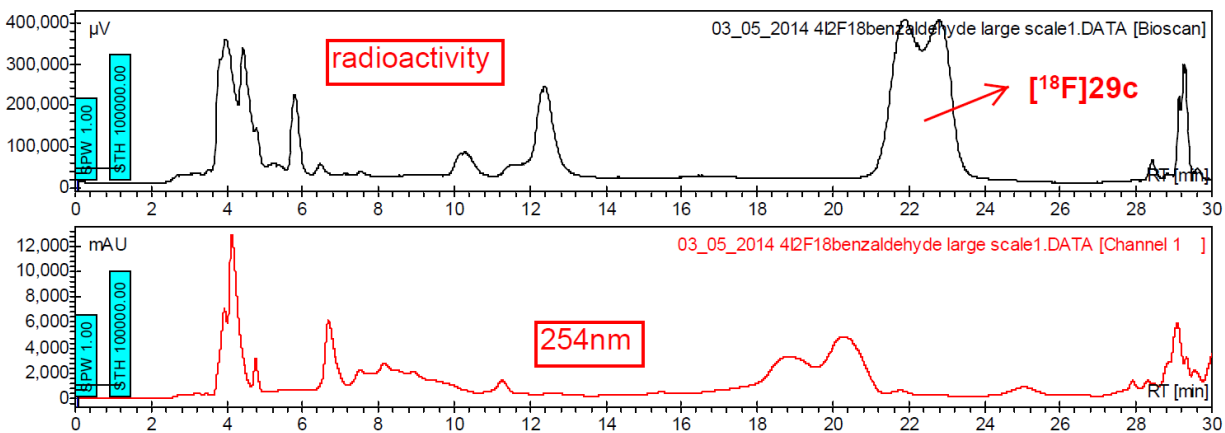



Figure S7. Preparative Radio-HPLC chromatogram of N-succinimidyl 2- $^{18}\text{F}$ fluoro-4-iodobenzoate ( $^{18}\text{F}$ 30c. 10 X 250mm, 10 micron Phenomenex Luna C18 column, 50/50/0.1 water/acetonitrile/TFA, 4mL/m.

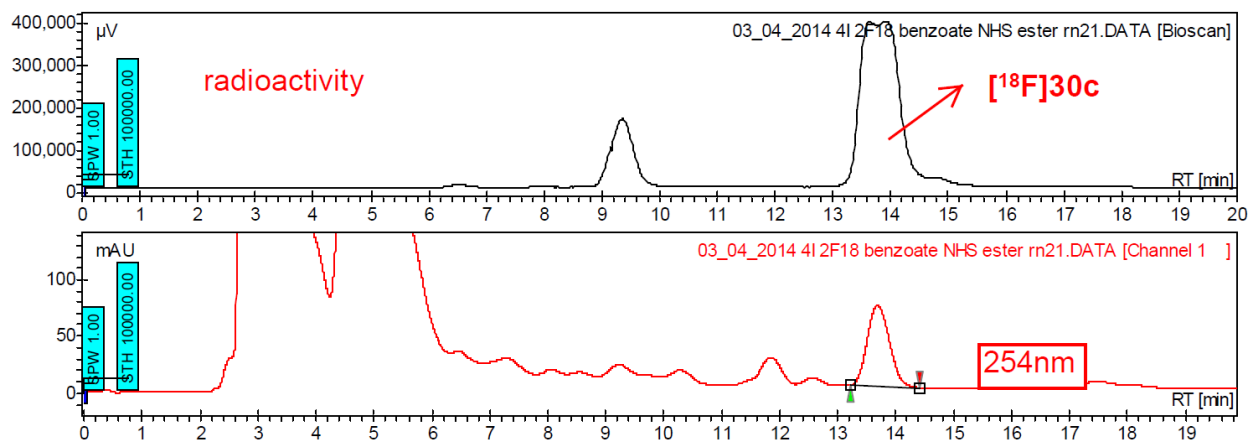

Figure S8. Preparative Radio-HPLC chromatogram of (S)-2-(((S)-5-(4-iodo-2- $^{18}\text{F}$ fluorobenzamido)-1-carboxypentyl)carbamoyl)oxy)pentanedioic acid ( $^{18}\text{F}$ 24. 10 X 250mm, 10 micron Phenomenex Luna C18 column, 70/30/0.1 water/acetonitrile/TFA, 4mL/m.

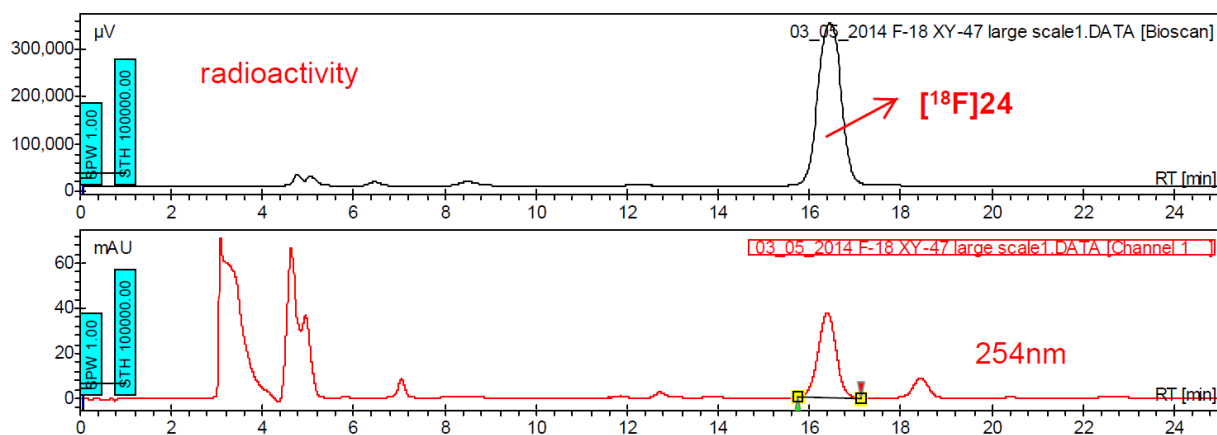

Figure S9. Quality control analytical radio-HPLC chromatogram of purified (S)-2-((((S)-5-(4-iodo-2-[<sup>18</sup>F]fluorobenzamido)-1-carboxypentyl)carbamoyl)oxy)pentanedioic acid ([<sup>18</sup>F]**24**). 4.6 X 150mm, 10 micron Phenomenex Luna C18 column, 70/30/0.1 water/acetonitrile/TFA, 1mL/m.

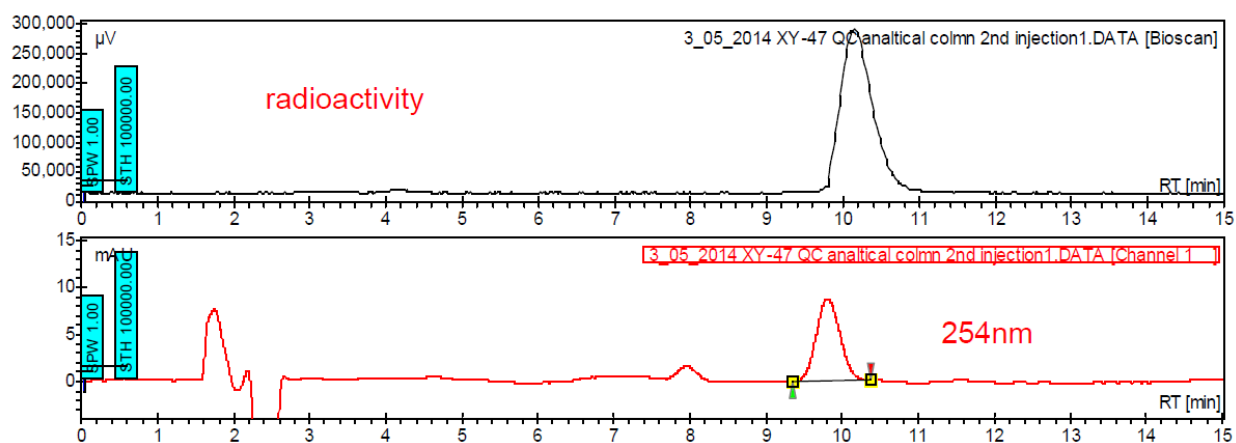

## NMR spectra of synthesized compounds:

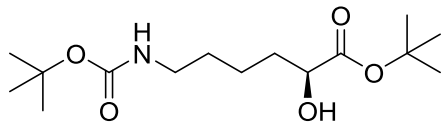

15

|                        |                      |                        |                                                                              |                      |                      |
|------------------------|----------------------|------------------------|------------------------------------------------------------------------------|----------------------|----------------------|
| Acquisition Time (sec) | 6.3615               | Comment                | 1H 1D CDCl3 (C:\data\Martin_Pomper) MP_xing 11                               | Date                 | 27 May 2014 11:34:49 |
| Date Stamp             | 27 May 2014 11:34:49 | File Name              | C:\USERS\XYANG45\JU FILES\NMR\CARBAMATE CHARACTERIZATION\XY05272014-A-H 1.DX | Frequency (MHz)      | 499.80               |
| Nucleus                | 1H                   | Number of Transients   | 32                                                                           | Origin               | MP_xing              |
| Owner                  | MP_xing              | Points Count           | 65536                                                                        | Solvent              | CHLOROFORM-d         |
| Sweep Width (Hz)       | 10302.04             | Temperature (degree C) | 23.299                                                                       | Spectrum Offset (Hz) | 3067.4160            |

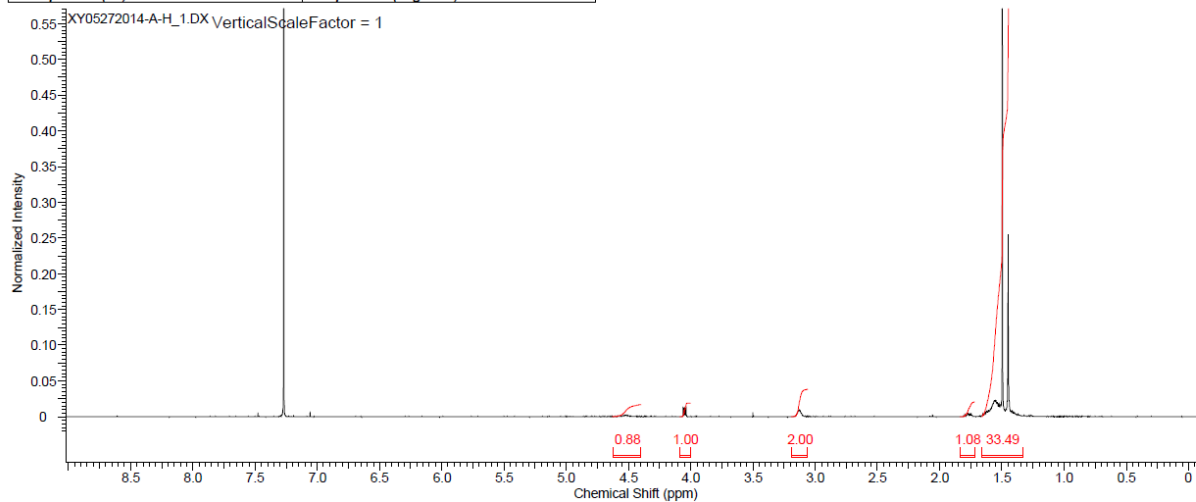

|                        |                      |                      |                                                                                |                        |                      |
|------------------------|----------------------|----------------------|--------------------------------------------------------------------------------|------------------------|----------------------|
| Acquisition Time (sec) | 1.1010               | Comment              | 13C 1D CDCl3 (C:\data\Martin_Pomper) MP_xing 12                                | Date                   | 27 May 2014 20:52:17 |
| Date Stamp             | 27 May 2014 20:52:17 | File Name            | C:\USERS\XYANG45\JU FILES\NMR\CARBAMATE CHARACTERIZATION\XY05272014-A-13C 1.DX | Frequency (MHz)        | 125.69               |
| Nucleus                | 13C                  | Number of Transients | 2048                                                                           | Origin                 | MP_xing              |
| Owner                  | MP_xing              | Points Count         | 32768                                                                          | Solvent                | CHLOROFORM-d         |
| Spectrum Offset (Hz)   | 12570.0527           | Sweep Width (Hz)     | 29761.00                                                                       | Temperature (degree C) | 23.299               |

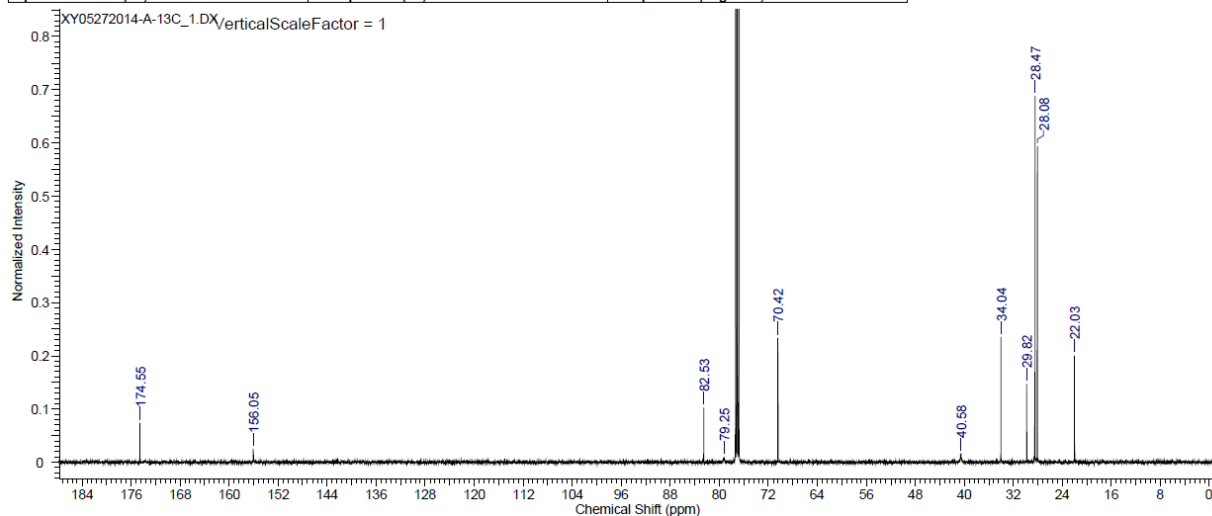

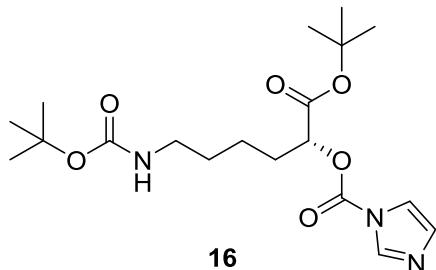

|                        |                      |                        |                                                                               |                      |                      |
|------------------------|----------------------|------------------------|-------------------------------------------------------------------------------|----------------------|----------------------|
| Acquisition Time (sec) | 6.3615               | Comment                | 1H 1D CDCl3 (C:\data\Martin_Pomper) MP_xing 7                                 | Date                 | 27 May 2014 17:31:15 |
| Date Stamp             | 27 May 2014 17:31:15 | File Name              | C:\USERS\XYANG45\JHU FILES\NMR\CARBAMATE CHARACTERIZATION\XY05272014-B-H 1.DX |                      |                      |
| Nucleus                | 1H                   | Number of Transients   | 32                                                                            | Origin               | MP_xing              |
| Owner                  | MP_xing              | Points Count           | 65536                                                                         | Solvent              | CHLOROFORM-d         |
| Sweep Width (Hz)       | 10302.04             | Temperature (degree C) | 23.299                                                                        | Spectrum Offset (Hz) | 3067.4163            |

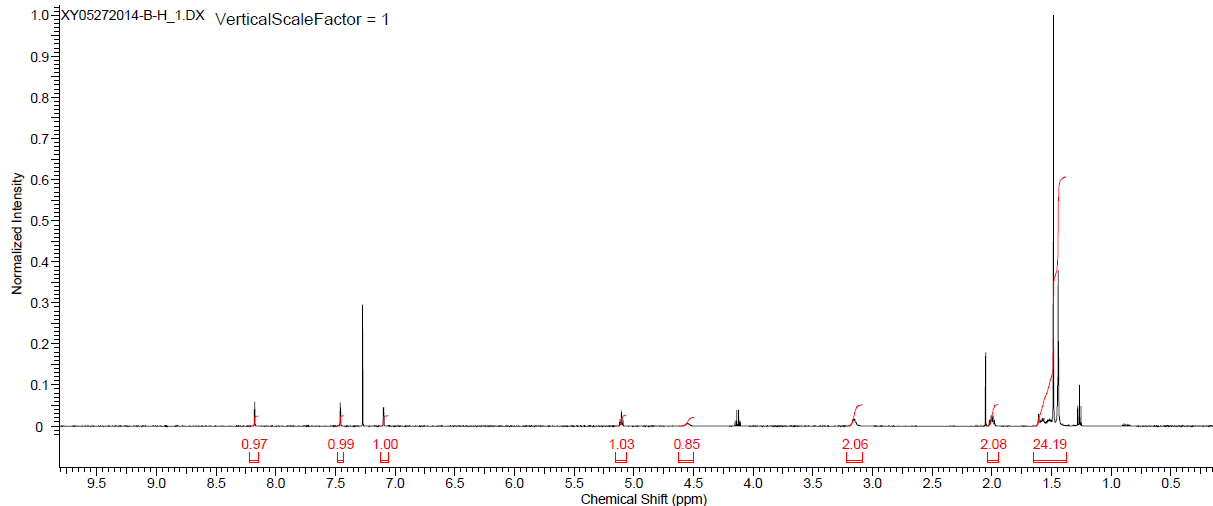

|                        |                      |                  |                                                                                 |                        |                      |
|------------------------|----------------------|------------------|---------------------------------------------------------------------------------|------------------------|----------------------|
| Acquisition Time (sec) | 1.1010               | Comment          | 13C 1D CDCl3 (C:\data\Martin_Pomper) MP_xing 8                                  | Date                   | 27 May 2014 22:45:41 |
| Date Stamp             | 27 May 2014 22:45:41 | File Name        | C:\USERS\XYANG45\JHU FILES\NMR\CARBAMATE CHARACTERIZATION\XY05272014-B-13C 1.DX |                        |                      |
| Frequency (MHz)        | 125.69               | Nucleus          | 13C                                                                             | Number of Transients   | 2048                 |
| Original Points Count  | 32768                | Owner            | MP_xing                                                                         | Points Count           | 32768                |
| Spectrum Offset (Hz)   | 12570.0527           | Sweep Width (Hz) | 29761.00                                                                        | Temperature (degree C) | 23.299               |

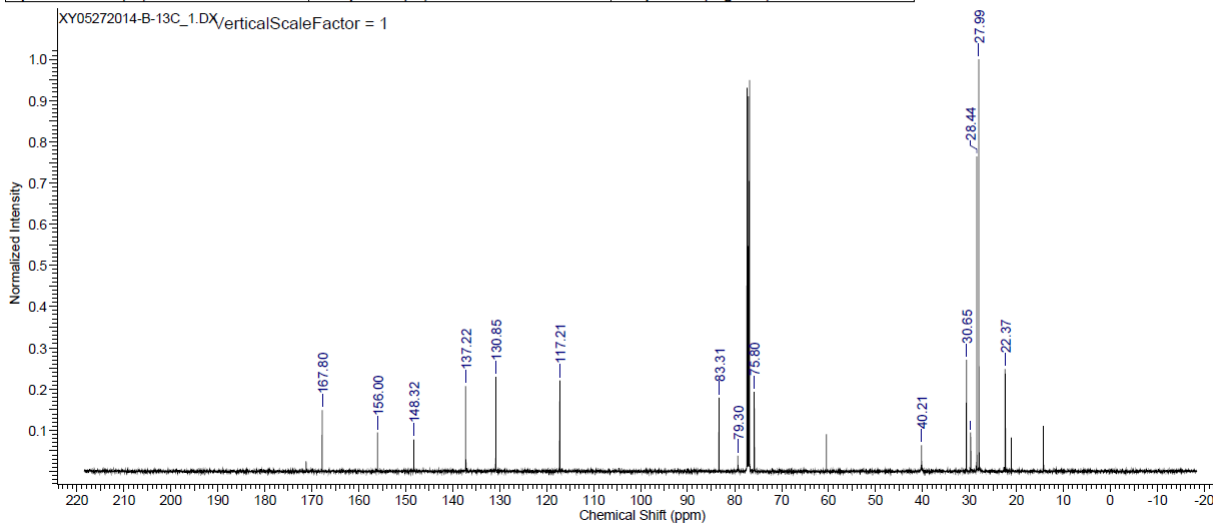

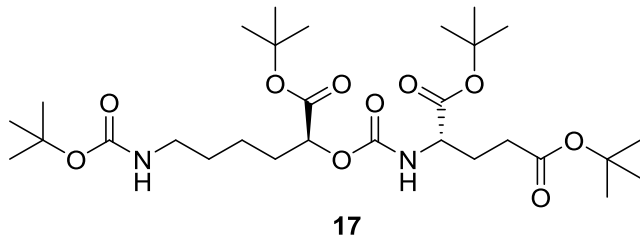

|                        |                      |                  |                                                                               |                        |                      |
|------------------------|----------------------|------------------|-------------------------------------------------------------------------------|------------------------|----------------------|
| Acquisition Time (sec) | 6.3615               | Comment          | 1H 1D CDCl3 (C:\data\Martin Pomper) MP_xing 3                                 | Date                   | 11 Jun 2014 16:11:13 |
| Date Stamp             | 11 Jun 2014 16:11:13 | File Name        | C:\USERS\XYANG45\JHU FILES\NMR\CARBAMATE CHARACTERIZATION\XY06112014-B-H_1.DX |                        |                      |
| Frequency (MHz)        | 499.80               | Nucleus          | 1H                                                                            | Number of Transients   | 32                   |
| Original Points Count  | 65536                | Owner            | MP_xing                                                                       | Points Count           | 65536                |
| Spectrum Offset (Hz)   | 3031.0864            | Sweep Width (Hz) | 10302.04                                                                      | Temperature (degree C) | 23.299               |

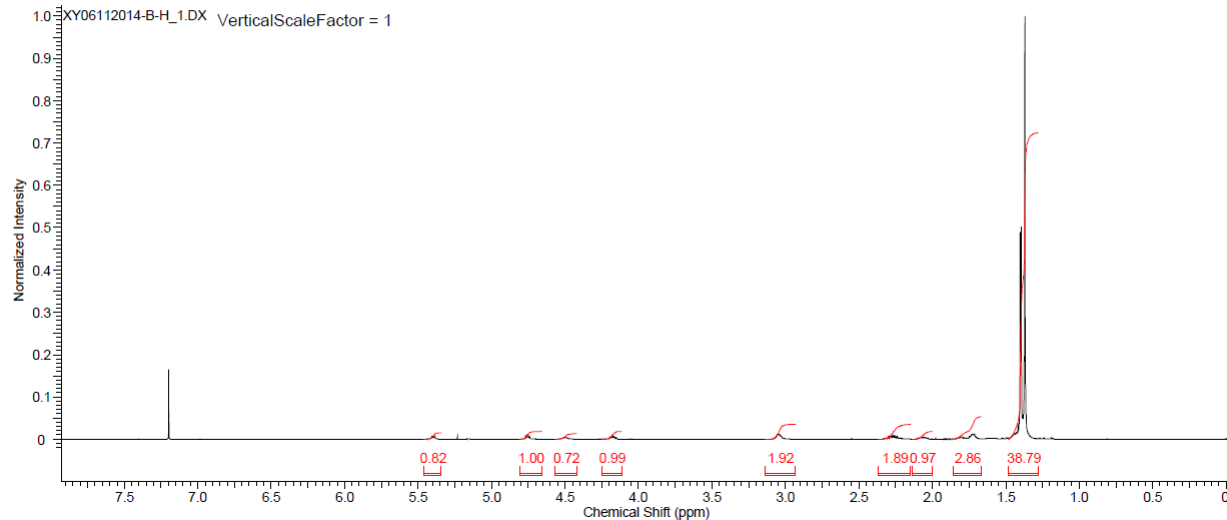

|                        |                      |                  |                                                                                 |                        |                      |
|------------------------|----------------------|------------------|---------------------------------------------------------------------------------|------------------------|----------------------|
| Acquisition Time (sec) | 1.1010               | Comment          | 13C 1D CDCl3 (C:\data\Martin Pomper) MP_xing 4                                  | Date                   | 11 Jun 2014 20:52:28 |
| Date Stamp             | 11 Jun 2014 20:52:28 | File Name        | C:\USERS\XYANG45\JHU FILES\NMR\CARBAMATE CHARACTERIZATION\XY06112014-B-13C_1.DX |                        |                      |
| Frequency (MHz)        | 125.69               | Nucleus          | 13C                                                                             | Number of Transients   | 2048                 |
| Original Points Count  | 32768                | Owner            | MP_xing                                                                         | Points Count           | 32768                |
| Spectrum Offset (Hz)   | 12570.0527           | Sweep Width (Hz) | 29761.00                                                                        | Temperature (degree C) | 23.299               |

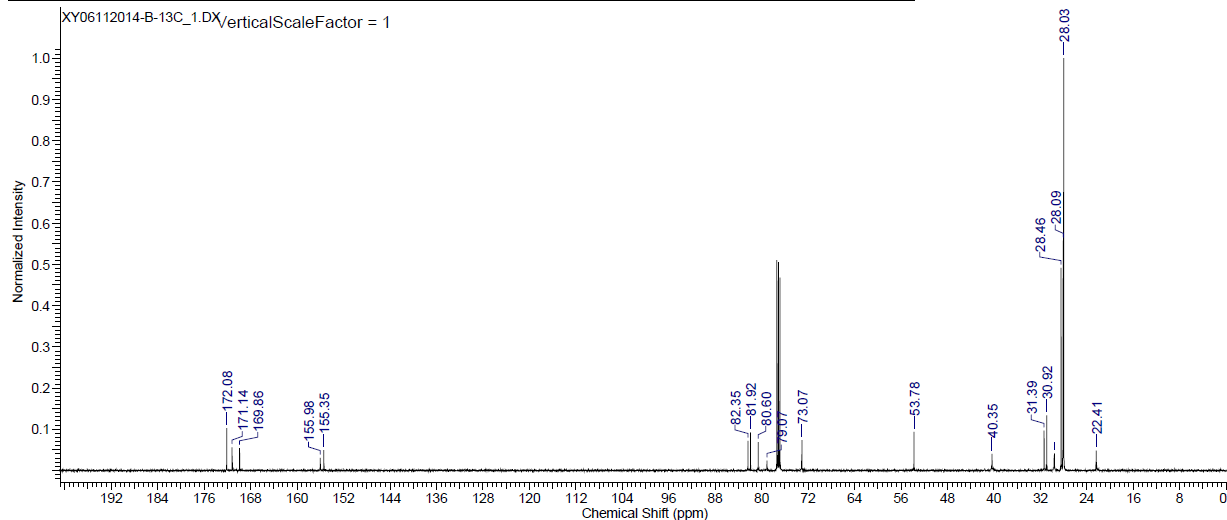

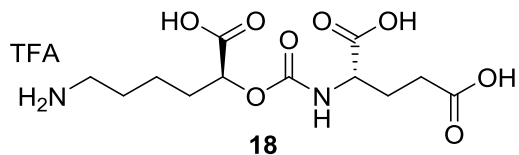

|                        |                                                                              |                        |                                              |                      |                      |
|------------------------|------------------------------------------------------------------------------|------------------------|----------------------------------------------|----------------------|----------------------|
| Acquisition Time (sec) | 6.3615                                                                       | Comment                | 1H 1D D2O (C:\data\Martin_Pomper) MP_xing_12 | Date                 | 20 May 2014 17:13:58 |
| Date Stamp             | 20 May 2014 17:13:58                                                         |                        |                                              |                      |                      |
| File Name              | C:\USERS\XYANG45\JU FILES\NMR\CARBAMATE CHARACTERIZATION\XY05202014-B-H_1.DX |                        |                                              | Frequency (MHz)      | 499.80               |
| Nucleus                | 1H                                                                           | Number of Transients   | 32                                           | Origin               | MP_xing              |
| Owner                  | MP_xing                                                                      | Points Count           | 65536                                        | Solvent              | DEUTERIUM OXIDE      |
| Sweep Width (Hz)       | 10302.04                                                                     | Temperature (degree C) | 23.299                                       | Spectrum Offset (Hz) | 3086.5986            |

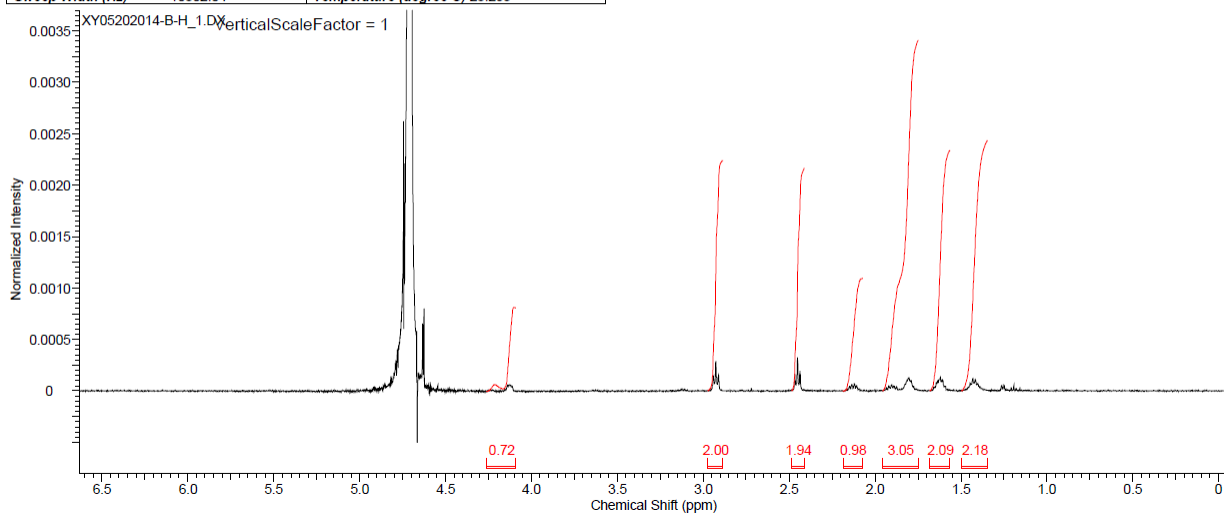

|                        |                      |                  |                                               |                        |                      |
|------------------------|----------------------|------------------|-----------------------------------------------|------------------------|----------------------|
| Acquisition Time (sec) | 1.1010               | Comment          | 13C 1D D2O (C:\data\Martin_Pomper) MP_xing_13 | Date                   | 20 May 2014 21:53:51 |
| Date Stamp             | 20 May 2014 21:53:51 |                  |                                               |                        |                      |
| Frequency (MHz)        | 125.69               | Nucleus          | 13C                                           | Number of Transients   | 2048                 |
| Original Points Count  | 32768                | Owner            | MP_xing                                       | Points Count           | 32768                |
| Spectrum Offset (Hz)   | 12570.0527           | Sweep Width (Hz) | 29761.00                                      | Temperature (degree C) | 23.299               |

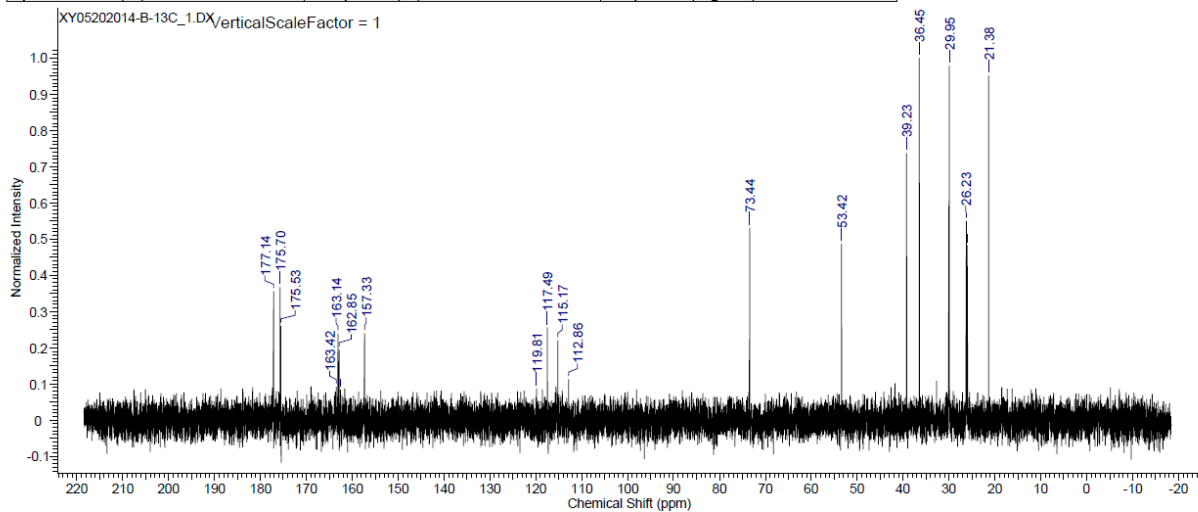

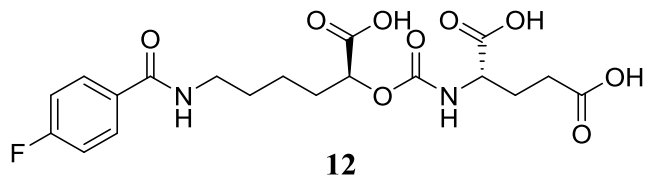

|                        |                                                                        |                        |                                                    |                      |                      |
|------------------------|------------------------------------------------------------------------|------------------------|----------------------------------------------------|----------------------|----------------------|
| Acquisition Time (sec) | 6.3615                                                                 | Comment                | 1H 1D CH3CN+D2O (C:\data\Martin Pomper) MP_xing 14 | Date                 | 27 May 2014 17:36:27 |
| Date Stamp             | 27 May 2014 17:36:27                                                   |                        |                                                    |                      |                      |
| File Name              | C:\USERS\XYANG45\JHU FILES\NMR\CARBAMATE CHARACTERIZATION\XY-20-H_1.DX |                        |                                                    | Frequency (MHz)      | 499.80               |
| Nucleus                | 1H                                                                     | Number of Transients   | 32                                                 | Origin               | MP_xing              |
| Owner                  | MP_xing                                                                | Points Count           | 65536                                              | Solvent              | CH3CN+D2O            |
| Sweep Width (Hz)       | 10302.04                                                               | Temperature (degree C) | 23.299                                             | Spectrum Offset (Hz) | 3115.1797            |

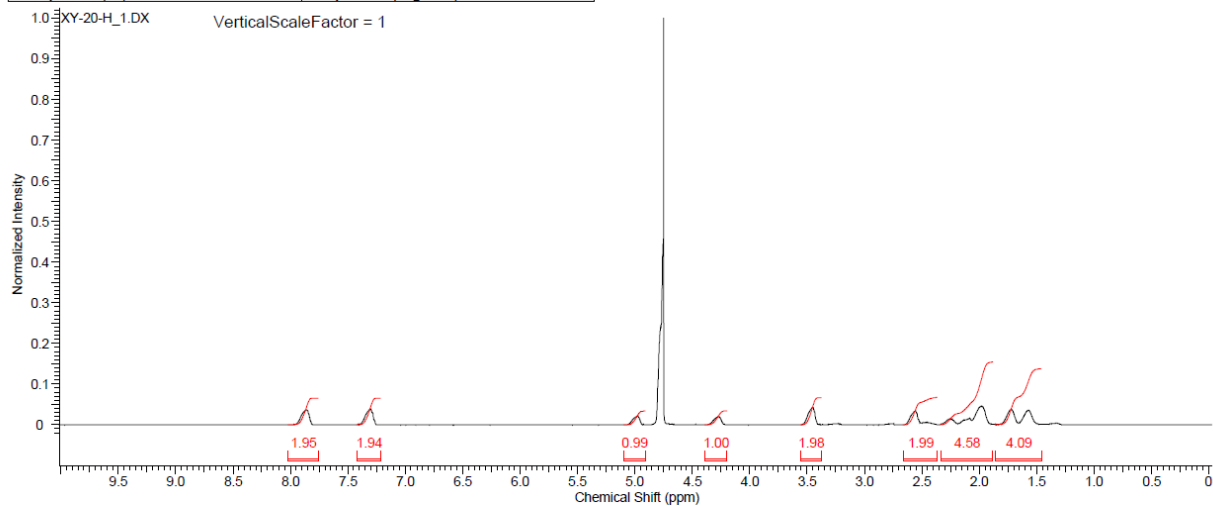

|                        |                                                                          |                        |                                                     |                      |                      |
|------------------------|--------------------------------------------------------------------------|------------------------|-----------------------------------------------------|----------------------|----------------------|
| Acquisition Time (sec) | 1.1010                                                                   | Comment                | 13C 1D CH3CN+D2O (C:\data\Martin Pomper) MP_xing 15 | Date                 | 28 May 2014 00:40:19 |
| Date Stamp             | 28 May 2014 00:40:19                                                     |                        |                                                     |                      |                      |
| File Name              | C:\USERS\XYANG45\JHU FILES\NMR\CARBAMATE CHARACTERIZATION\XY-20-13C_1.DX |                        |                                                     | Frequency (MHz)      | 125.69               |
| Nucleus                | 13C                                                                      | Number of Transients   | 2048                                                | Origin               | MP_xing              |
| Owner                  | MP_xing                                                                  | Points Count           | 32768                                               | Solvent              | CH3CN+D2O            |
| Sweep Width (Hz)       | 29761.00                                                                 | Temperature (degree C) | 23.299                                              | Spectrum Offset (Hz) | 12570.0527           |

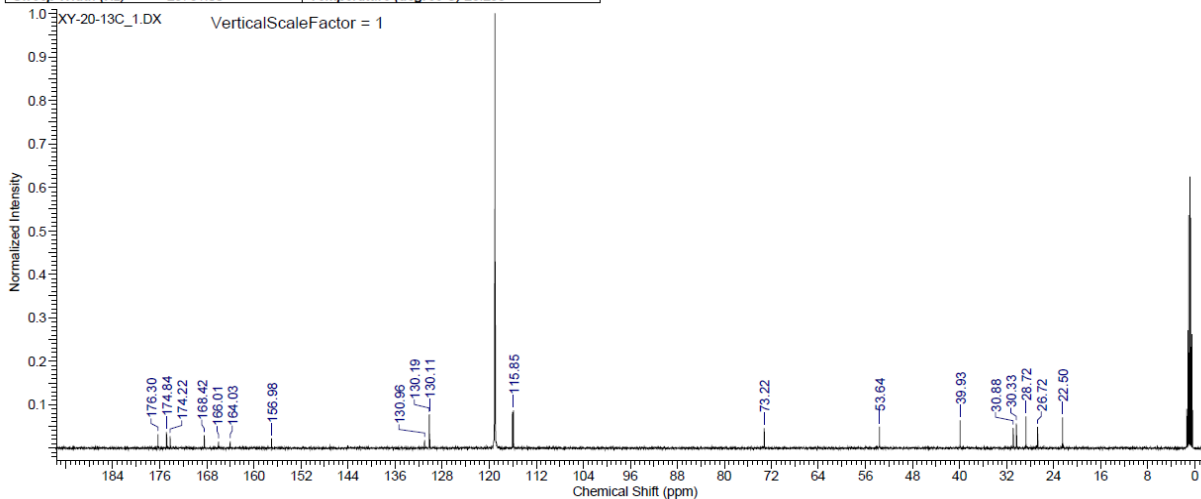

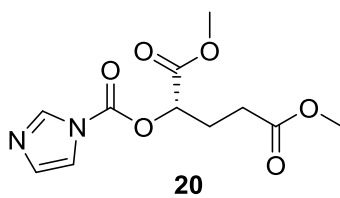

|                        |                                                                                |                        |                                                |         |                 |                       |           |
|------------------------|--------------------------------------------------------------------------------|------------------------|------------------------------------------------|---------|-----------------|-----------------------|-----------|
| Acquisition Time (sec) | 6.3615                                                                         | Comment                | 1H 1D CDCl3 (C:\data\Martin Pomper) MP_xing 13 |         | Date            | 08 May 2014 19:02:43  |           |
| Date Stamp             | 08 May 2014 19:02:43                                                           |                        |                                                |         |                 |                       |           |
| File Name              | C:\USERS\XYANG45\JHU FILES\NMR\CARBAMATE CHARACTERIZATION\XY05082014-A2-H 1.DX |                        |                                                |         | Frequency (MHz) | 499.80                |           |
| Nucleus                | 1H                                                                             | Number of Transients   | 16                                             | Origin  | MP_xing         | Original Points Count | 65536     |
| Owner                  | MP_xing                                                                        | Points Count           | 65536                                          | Solvent | CHLOROFORM-d    | Spectrum Offset (Hz)  | 3086.5986 |
| Sweep Width (Hz)       | 10302.04                                                                       | Temperature (degree C) | 23.299                                         |         |                 |                       |           |

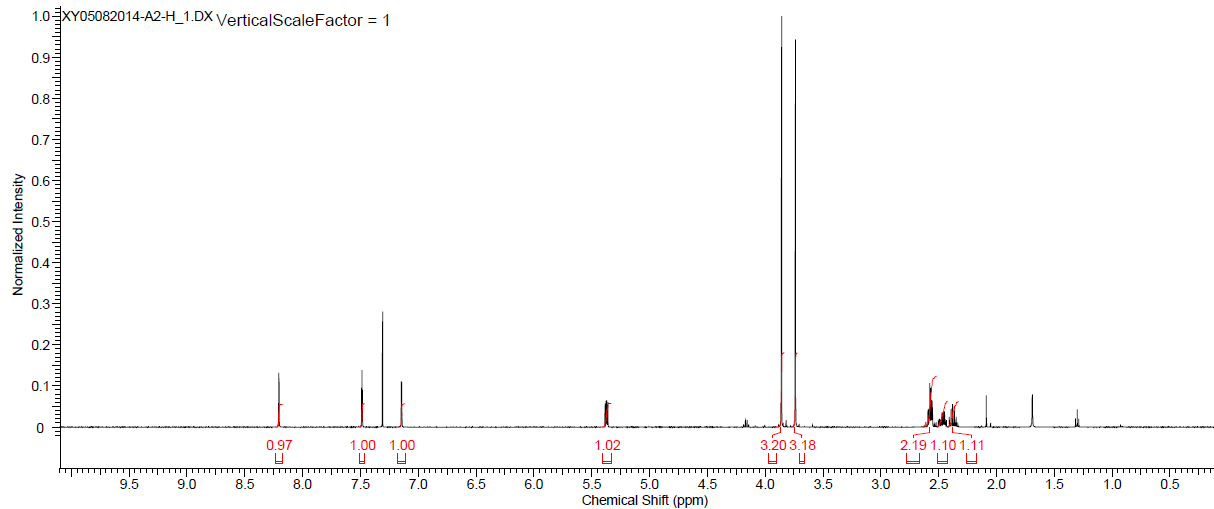

|                        |                                                                                 |                  |                                                 |                      |       |                      |              |
|------------------------|---------------------------------------------------------------------------------|------------------|-------------------------------------------------|----------------------|-------|----------------------|--------------|
| Acquisition Time (sec) | 1.1010                                                                          | Comment          | 13C 1D CDCl3 (C:\data\Martin Pomper) MP_xing 12 |                      | Date  | 08 May 2014 19:33:25 |              |
| Date Stamp             | 08 May 2014 19:33:25                                                            |                  |                                                 |                      |       |                      |              |
| File Name              | C:\USERS\XYANG45\JHU FILES\NMR\CARBAMATE CHARACTERIZATION\XY05082014-A-13C 1.DX |                  |                                                 |                      |       |                      |              |
| Frequency (MHz)        | 125.69                                                                          | Nucleus          | 13C                                             | Number of Transients | 512   | Origin               | MP_xing      |
| Original Points Count  | 32768                                                                           | Owner            | MP_xing                                         | Points Count         | 32768 | Solvent              | CHLOROFORM-d |
| Spectrum Offset (Hz)   | 12570.0527                                                                      | Sweep Width (Hz) | 29761.00                                        |                      |       |                      |              |

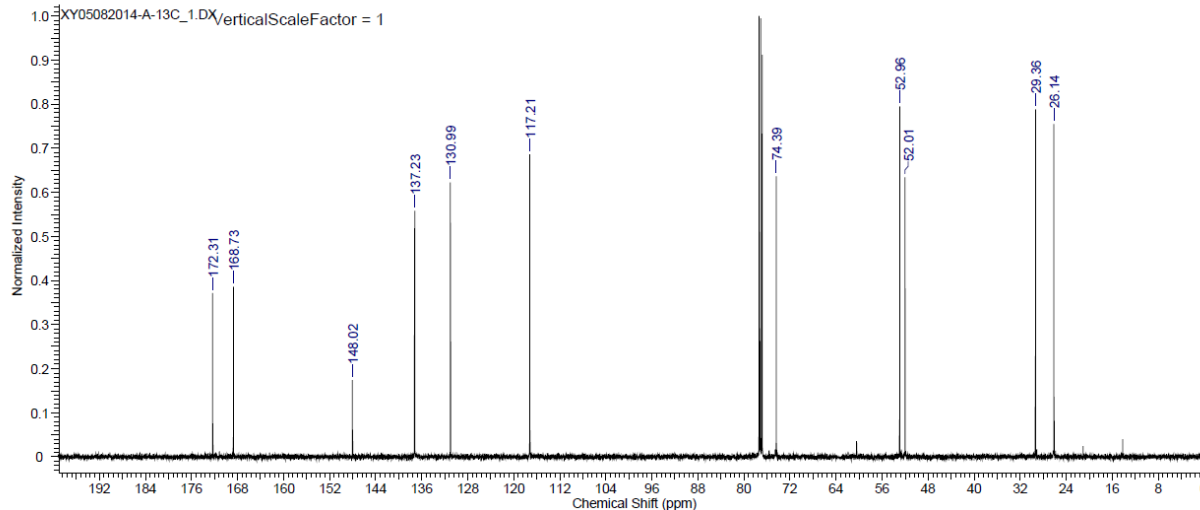



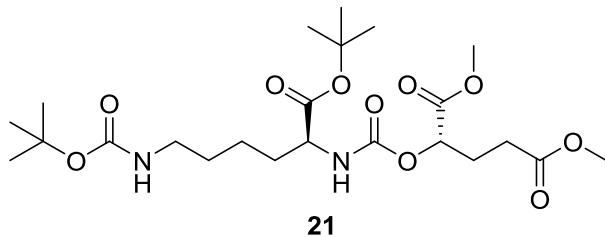

|                        |                      |                        |                                                                               |                      |                      |
|------------------------|----------------------|------------------------|-------------------------------------------------------------------------------|----------------------|----------------------|
| Acquisition Time (sec) | 6.3615               | Comment                | 1H 1D CDCl3 (C:\data\Martin Pomper) MP_xing 1                                 | Date                 | 16 May 2014 20:35:17 |
| Date Stamp             | 16 May 2014 20:35:17 | File Name              | C:\USERS\XYANG45\JU FILES\NMR\CARBAMATE CHARACTERIZATION\XY-05162014-A-H_1.DX |                      |                      |
| Nucleus                | 1H                   | Number of Transients   | 32                                                                            | Origin               | MP_xing              |
| Owner                  | MP_xing              | Points Count           | 65536                                                                         | Solvent              | CHLOROFORM-d         |
| Sweep Width (Hz)       | 10302.04             | Temperature (degree C) | 23.299                                                                        | Spectrum Offset (Hz) | 3086.5986            |

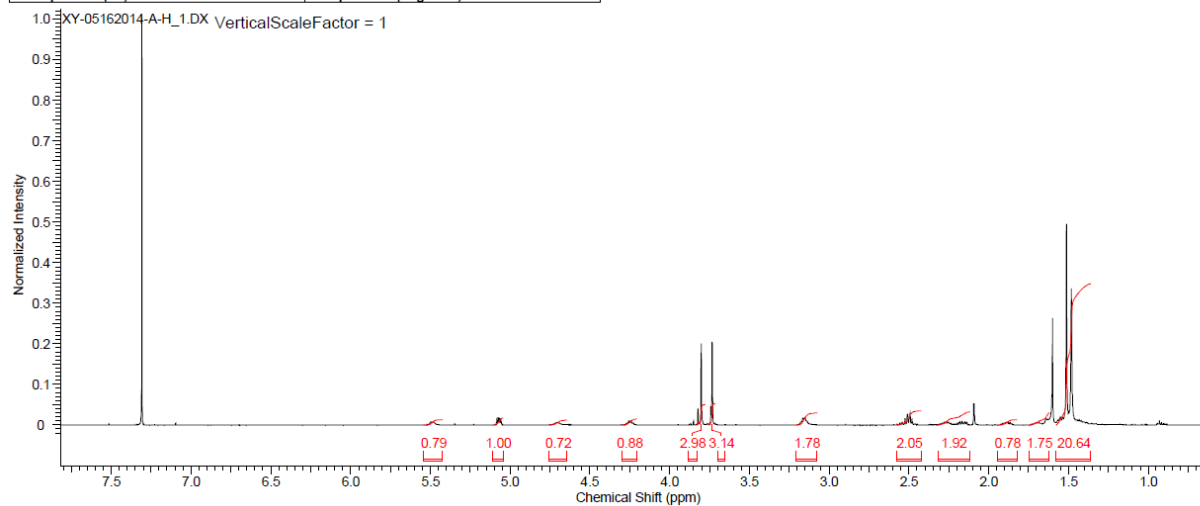

|                        |                      |                  |                                                                                |                        |                      |
|------------------------|----------------------|------------------|--------------------------------------------------------------------------------|------------------------|----------------------|
| Acquisition Time (sec) | 1.1010               | Comment          | 13C 1D CDCl3 (C:\data\Martin Pomper) MP_xing 2                                 | Date                   | 16 May 2014 22:26:54 |
| Date Stamp             | 16 May 2014 22:26:54 | File Name        | C:\USERS\XYANG45\JU FILES\NMR\CARBAMATE CHARACTERIZATION\XY05162014-A-13C_1.DX |                        |                      |
| Frequency (MHz)        | 125.69               | Nucleus          | 13C                                                                            | Number of Transients   | 2048                 |
| Original Points Count  | 32768                | Owner            | MP_xing                                                                        | Points Count           | 32768                |
| Spectrum Offset (Hz)   | 12570.0527           | Sweep Width (Hz) | 29761.00                                                                       | Temperature (degree C) | 23.299               |

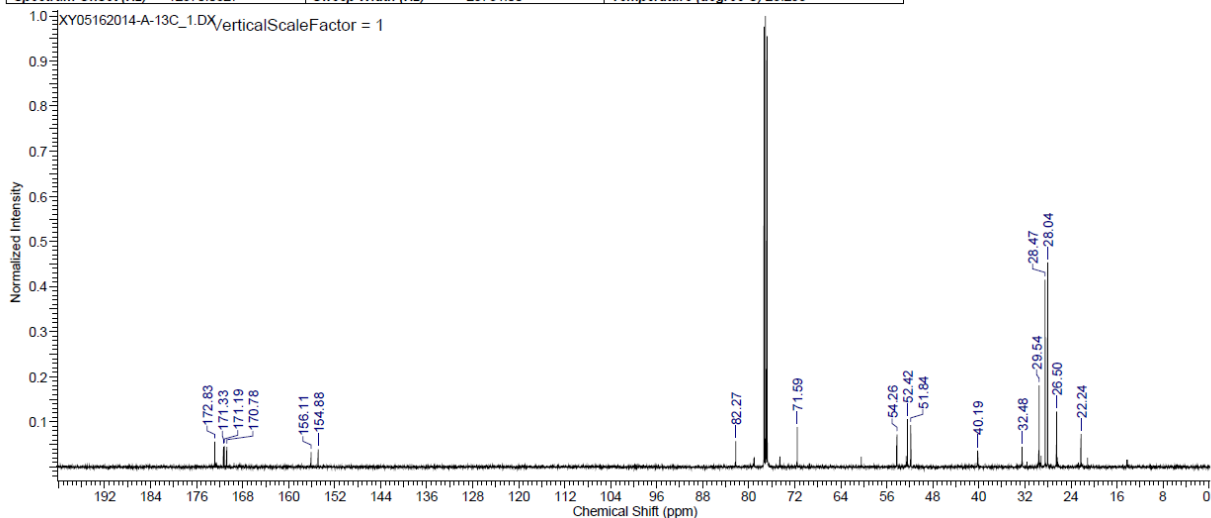

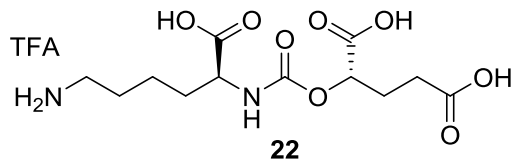

|                        |                      |                  |                                                                              |                        |                      |
|------------------------|----------------------|------------------|------------------------------------------------------------------------------|------------------------|----------------------|
| Acquisition Time (sec) | 6.3615               | Comment          | 1H 1D D2O (C:\data\Martin_Pomper) MP_xing_13                                 | Date                   | 12 Jun 2014 18:13:18 |
| Date Stamp             | 12 Jun 2014 18:13:18 | File Name        | C:\USERS\XYANG45\JU FILES\NMR\CARBAMATE CHARACTERIZATION\XY06122014-A-H_1.DX | Origin                 | MP_xing              |
| Frequency (MHz)        | 499.80               | Nucleus          | 1H                                                                           | Number of Transients   | 32                   |
| Original Points Count  | 65536                | Owner            | MP_xing                                                                      | Points Count           | 65536                |
| Spectrum Offset (Hz)   | 3086.5986            | Sweep Width (Hz) | 10302.04                                                                     | Temperature (degree C) | 23.299               |

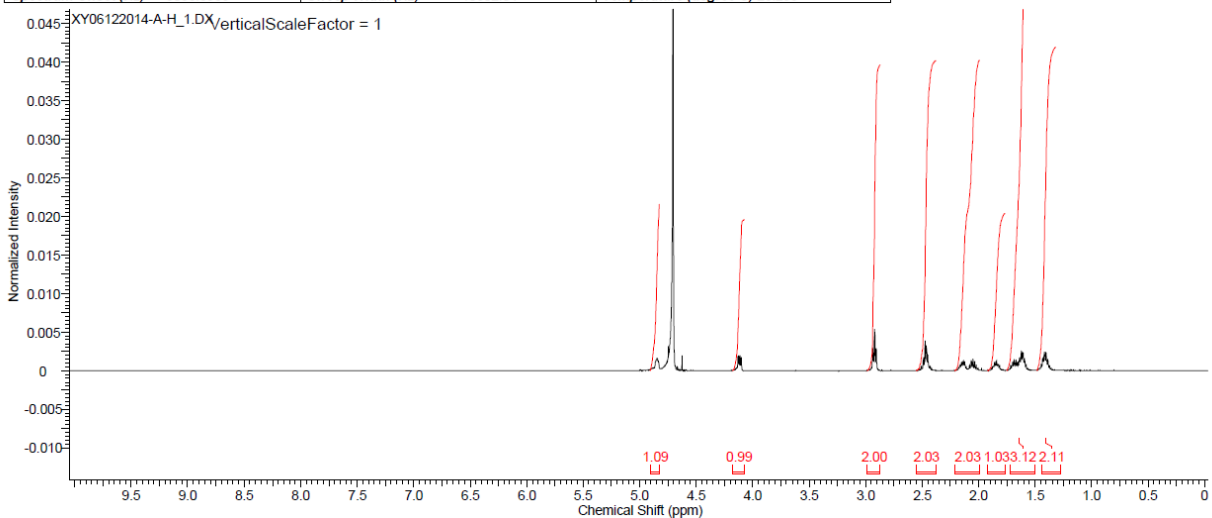

|                        |                      |                  |                                                                                |                        |                      |
|------------------------|----------------------|------------------|--------------------------------------------------------------------------------|------------------------|----------------------|
| Acquisition Time (sec) | 1.1010               | Comment          | 13C 1D D2O (C:\data\Martin_Pomper) MP_xing_14                                  | Date                   | 12 Jun 2014 20:50:51 |
| Date Stamp             | 12 Jun 2014 20:50:51 | File Name        | C:\USERS\XYANG45\JU FILES\NMR\CARBAMATE CHARACTERIZATION\XY06122014-A-13C_1.DX | Origin                 | MP_xing              |
| Frequency (MHz)        | 125.69               | Nucleus          | 13C                                                                            | Number of Transients   | 2048                 |
| Original Points Count  | 32768                | Owner            | MP_xing                                                                        | Points Count           | 32768                |
| Spectrum Offset (Hz)   | 12570.0527           | Sweep Width (Hz) | 29761.00                                                                       | Temperature (degree C) | 23.299               |

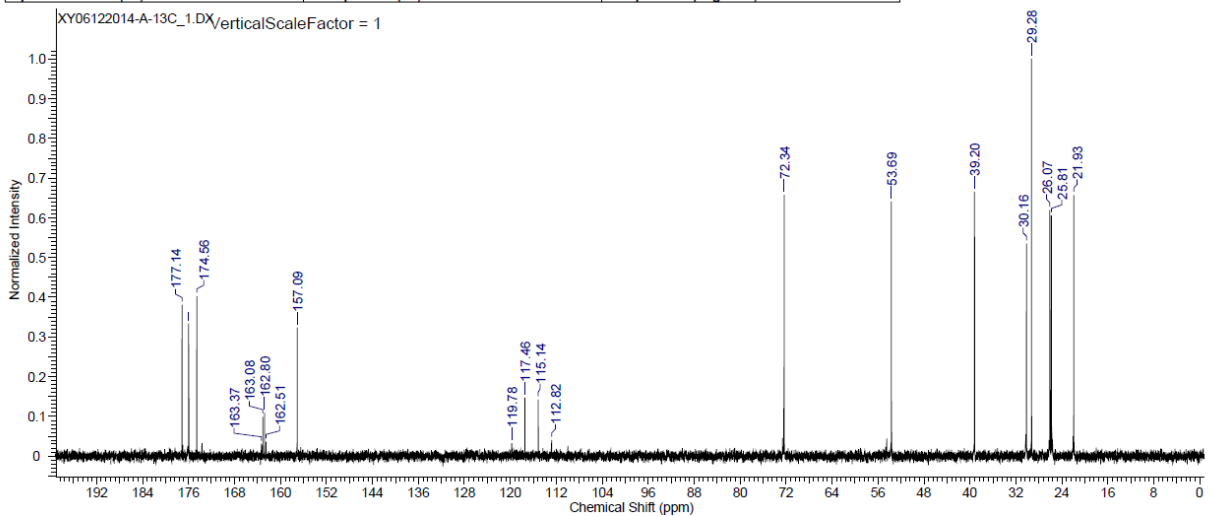

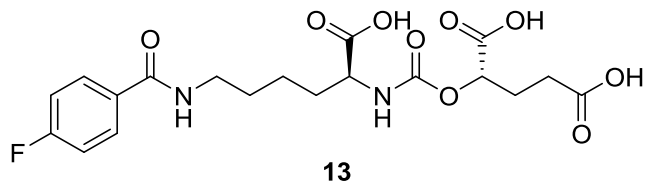

|                        |                      |                  |                                                                               |                        |                      |
|------------------------|----------------------|------------------|-------------------------------------------------------------------------------|------------------------|----------------------|
| Acquisition Time (sec) | 6.3615               | Comment          | 1H 1D CH3CN+D2O (C:\data\Martin_Pomper) MP_xing_2                             | Date                   | 17 Jun 2014 17:21:38 |
| Date Stamp             | 17 Jun 2014 17:21:38 | File Name        | C:\USERS\XYANG45\JU FILES\NMR\CARBAMATE CHARACTERIZATION\XY0617-A-H-XY48_1.DX |                        |                      |
| Frequency (MHz)        | 499.80               | Nucleus          | 1H                                                                            | Number of Transients   | 32                   |
| Original Points Count  | 65536                | Owner            | MP_xing                                                                       | Points Count           | 65536                |
| Spectrum Offset (Hz)   | 3113.7649            | Sweep Width (Hz) | 10302.04                                                                      | Temperature (degree C) | 23.299               |
|                        |                      |                  |                                                                               | Solvent                | CH3CN+D2O            |

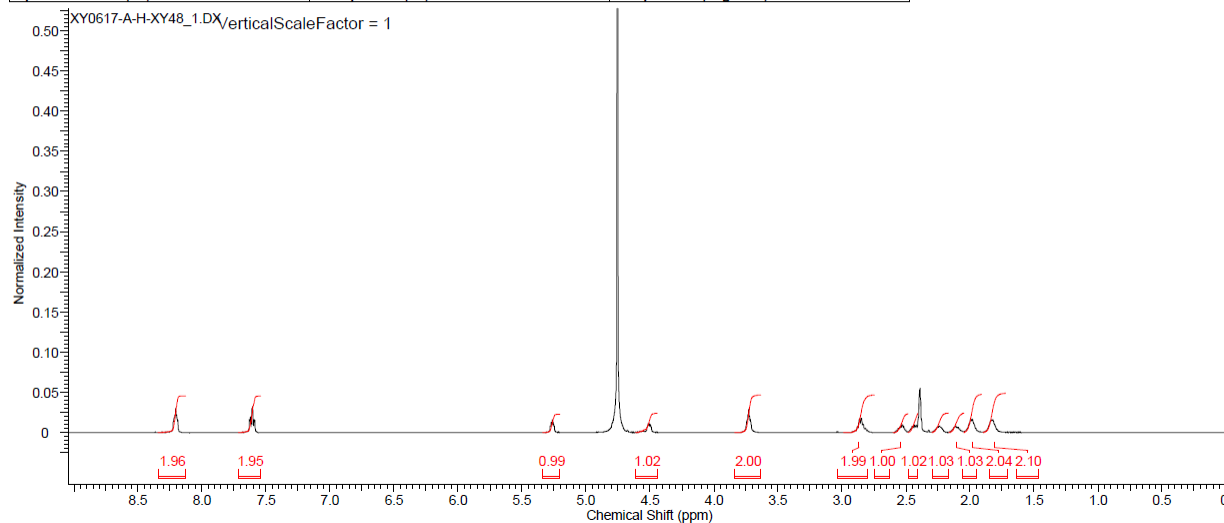

|                        |                      |                  |                                                                                 |                        |                      |
|------------------------|----------------------|------------------|---------------------------------------------------------------------------------|------------------------|----------------------|
| Acquisition Time (sec) | 1.1010               | Comment          | 13C 1D CH3CN+D2O (C:\data\Martin_Pomper) MP_xing_3                              | Date                   | 17 Jun 2014 20:51:56 |
| Date Stamp             | 17 Jun 2014 20:51:56 | File Name        | C:\USERS\XYANG45\JU FILES\NMR\CARBAMATE CHARACTERIZATION\XY0617-A-13C-XY48_1.DX |                        |                      |
| Frequency (MHz)        | 125.69               | Nucleus          | 13C                                                                             | Number of Transients   | 2048                 |
| Original Points Count  | 32768                | Owner            | MP_xing                                                                         | Points Count           | 32768                |
| Spectrum Offset (Hz)   | 12570.0527           | Sweep Width (Hz) | 29761.00                                                                        | Temperature (degree C) | 23.299               |
|                        |                      |                  |                                                                                 | Solvent                | CH3CN+D2O            |

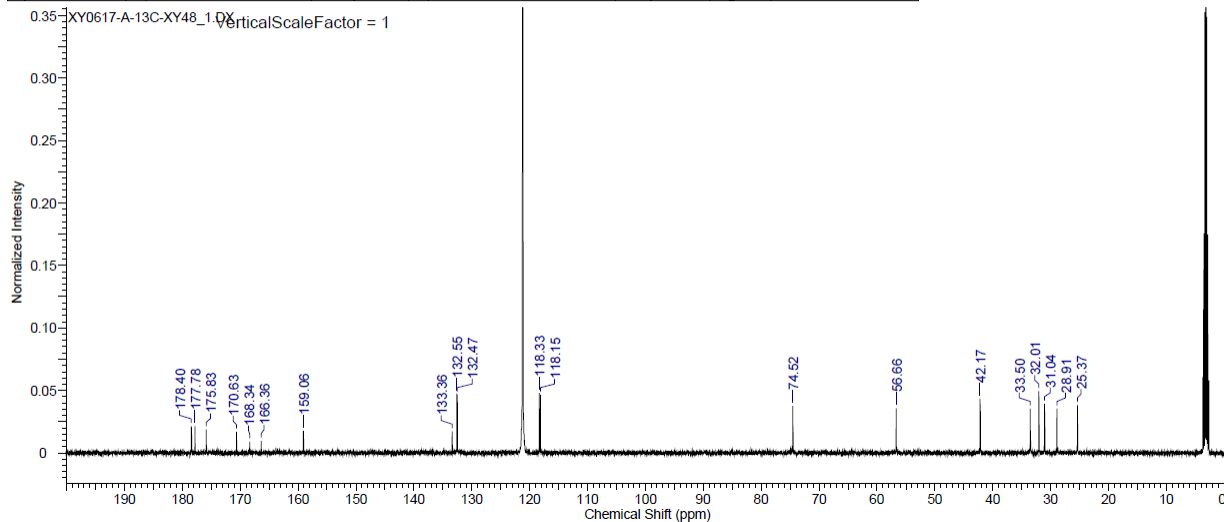

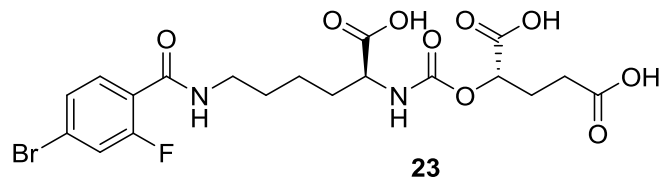

|                        |                      |                  |                                                                                |                        |                      |
|------------------------|----------------------|------------------|--------------------------------------------------------------------------------|------------------------|----------------------|
| Acquisition Time (sec) | 6.3615               | Comment          | 1H 1D CH3CN+D2O (C:\data\Martin Pomper) MP xing 6                              | Date                   | 25 Jun 2014 16:38:48 |
| Date Stamp             | 25 Jun 2014 16:38:48 | File Name        | C:\USERS\XYANG45\JHU FILES\NMR\CARBAMATE CHARACTERIZATION\XY0625-A-H-XY52 1.DX | Origin                 | MP xing              |
| Frequency (MHz)        | 499.80               | Nucleus          | 1H                                                                             | Number of Transients   | 32                   |
| Original Points Count  | 65536                | Owner            | MP xing                                                                        | Points Count           | 65536                |
| Spectrum Offset (Hz)   | 3110.4639            | Sweep Width (Hz) | 10302.04                                                                       | Temperature (degree C) | 23.299               |

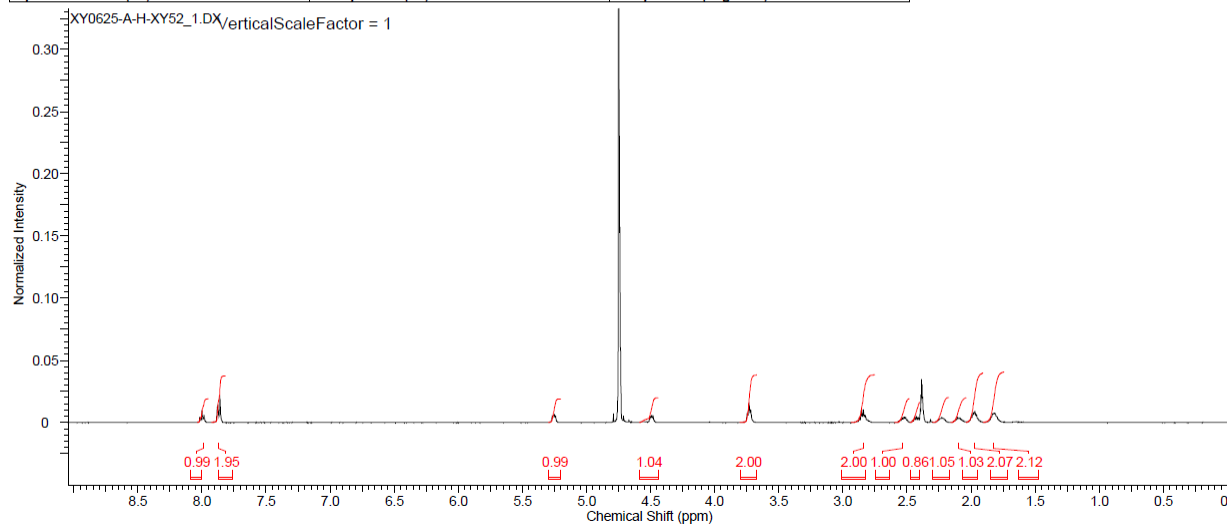

|                        |                      |                  |                                                                                  |                        |                      |
|------------------------|----------------------|------------------|----------------------------------------------------------------------------------|------------------------|----------------------|
| Acquisition Time (sec) | 1.1010               | Comment          | 13C 1D CH3CN+D2O (C:\data\Martin Pomper) MP xing 7                               | Date                   | 25 Jun 2014 21:47:34 |
| Date Stamp             | 25 Jun 2014 21:47:34 | File Name        | C:\USERS\XYANG45\JHU FILES\NMR\CARBAMATE CHARACTERIZATION\XY0625-A-XY25-13C 1.DX | Origin                 | MP xing              |
| Frequency (MHz)        | 125.69               | Nucleus          | 13C                                                                              | Number of Transients   | 2048                 |
| Original Points Count  | 32768                | Owner            | MP xing                                                                          | Points Count           | 32768                |
| Spectrum Offset (Hz)   | 12570.0527           | Sweep Width (Hz) | 29761.00                                                                         | Temperature (degree C) | 23.299               |

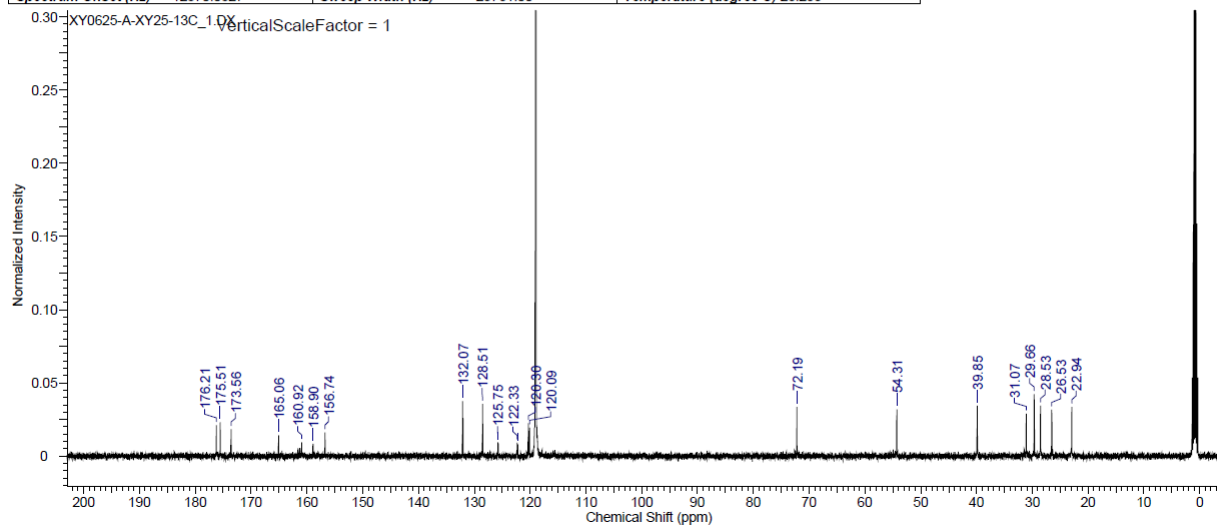

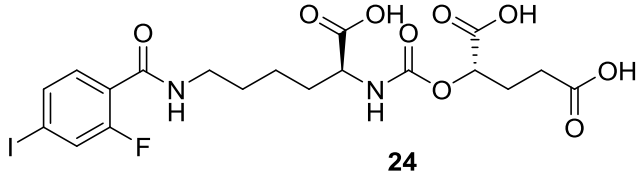

|                        |                      |                  |                                                                                |                        |                      |
|------------------------|----------------------|------------------|--------------------------------------------------------------------------------|------------------------|----------------------|
| Acquisition Time (sec) | 6.3615               | Comment          | 1H 1D CH3CN+D2O (C:\data\Martin_Pomper) MP_xing_11                             | Date                   | 24 Jun 2014 17:02:10 |
| Date Stamp             | 24 Jun 2014 17:02:10 | File Name        | C:\USERS\XYANG45\JHU FILES\NMR\CARBAMATE CHARACTERIZATION\XY0624-D-H-XY47_1.DX | Origin                 | MP_xing              |
| Frequency (MHz)        | 499.80               | Nucleus          | 1H                                                                             | Number of Transients   | 32                   |
| Original Points Count  | 65536                | Owner            | MP_xing                                                                        | Points Count           | 65536                |
| Spectrum Offset (Hz)   | 3112.8218            | Sweep Width (Hz) | 10302.04                                                                       | Temperature (degree C) | 23.299               |
|                        |                      | Solvent          | CH3CN+D2O                                                                      |                        |                      |

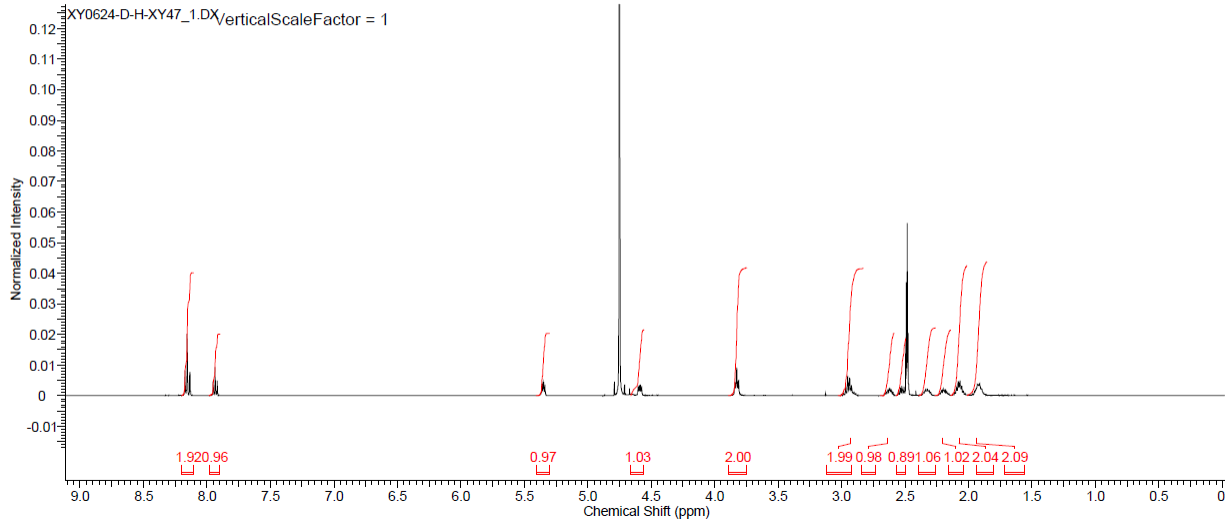

|                        |                      |                  |                                                                                  |                        |                      |
|------------------------|----------------------|------------------|----------------------------------------------------------------------------------|------------------------|----------------------|
| Acquisition Time (sec) | 1.1010               | Comment          | 13C 1D CH3CN+D2O (C:\data\Martin_Pomper) MP_xing_12                              | Date                   | 24 Jun 2014 20:51:51 |
| Date Stamp             | 24 Jun 2014 20:51:51 | File Name        | C:\USERS\XYANG45\JHU FILES\NMR\CARBAMATE CHARACTERIZATION\XY0624-D-13C-XY47_1.DX | Origin                 | MP_xing              |
| Frequency (MHz)        | 125.69               | Nucleus          | 13C                                                                              | Number of Transients   | 2048                 |
| Original Points Count  | 32768                | Owner            | MP_xing                                                                          | Points Count           | 32768                |
| Spectrum Offset (Hz)   | 12570.0527           | Sweep Width (Hz) | 29761.00                                                                         | Temperature (degree C) | 23.299               |
|                        |                      | Solvent          | CH3CN+D2O                                                                        |                        |                      |

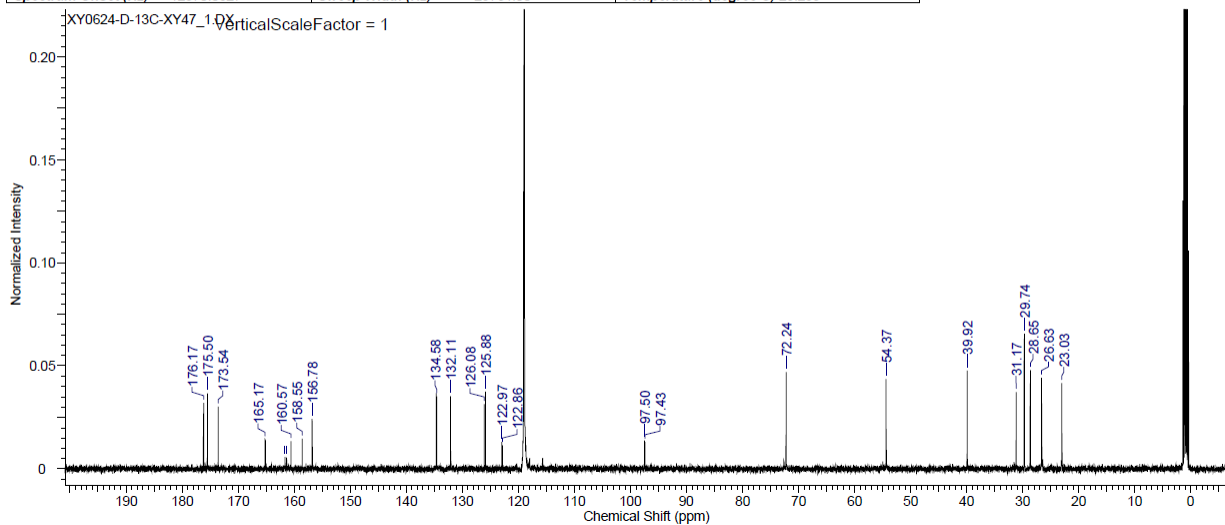

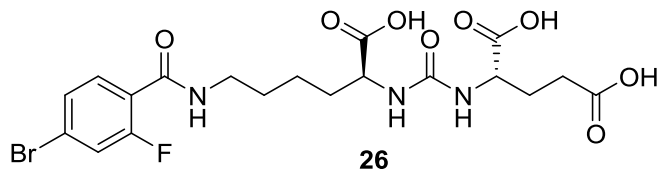

|                        |                      |                  |                                                                                 |                        |                      |
|------------------------|----------------------|------------------|---------------------------------------------------------------------------------|------------------------|----------------------|
| Acquisition Time (sec) | 6.3615               | Comment          | 1H 1D CH3CN+D2O (C:\data\Martin_Pomper\MP_xing 2                                | Date                   | 18 Jun 2014 17:04:33 |
| Date Stamp             | 18 Jun 2014 17:04:33 | File Name        | C:\USERS\XYANG45\JHU FILES\NMR\CARBAMATE CHARACTERIZATION\XY-0618-A-H-XY56_1.DX |                        |                      |
| Frequency (MHz)        | 499.80               | Nucleus          | 1H                                                                              | Number of Transients   | 32                   |
| Original Points Count  | 65536                | Owner            | MP_xing                                                                         | Points Count           | 65536                |
| Spectrum Offset (Hz)   | 3113.9221            | Sweep Width (Hz) | 10302.04                                                                        | Temperature (degree C) | 23.299               |
|                        |                      |                  |                                                                                 | Solvent                | CH3CN+D2O            |

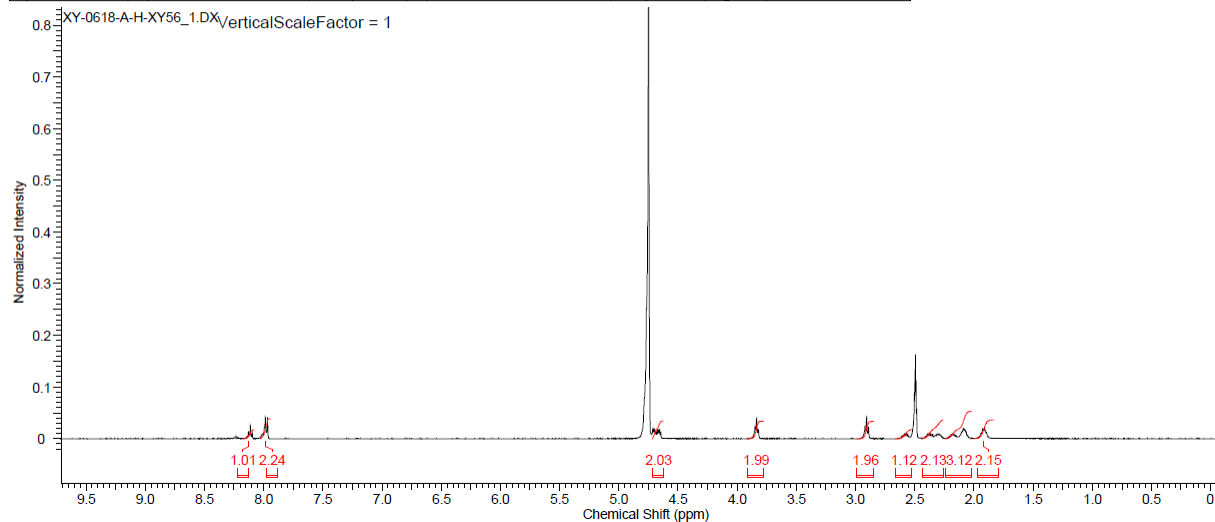

|                        |                      |                  |                                                                                   |                        |                      |
|------------------------|----------------------|------------------|-----------------------------------------------------------------------------------|------------------------|----------------------|
| Acquisition Time (sec) | 1.1010               | Comment          | 13C 1D CH3CN+D2O (C:\data\Martin_Pomper\MP_xing 3                                 | Date                   | 18 Jun 2014 20:51:24 |
| Date Stamp             | 18 Jun 2014 20:51:24 | File Name        | C:\USERS\XYANG45\JHU FILES\NMR\CARBAMATE CHARACTERIZATION\XY-0618-A-13C-XY56_1.DX |                        |                      |
| Frequency (MHz)        | 125.69               | Nucleus          | 13C                                                                               | Number of Transients   | 2048                 |
| Original Points Count  | 32768                | Owner            | MP_xing                                                                           | Points Count           | 32768                |
| Spectrum Offset (Hz)   | 12570.0527           | Sweep Width (Hz) | 29761.00                                                                          | Temperature (degree C) | 23.299               |
|                        |                      |                  |                                                                                   | Solvent                | CH3CN+D2O            |

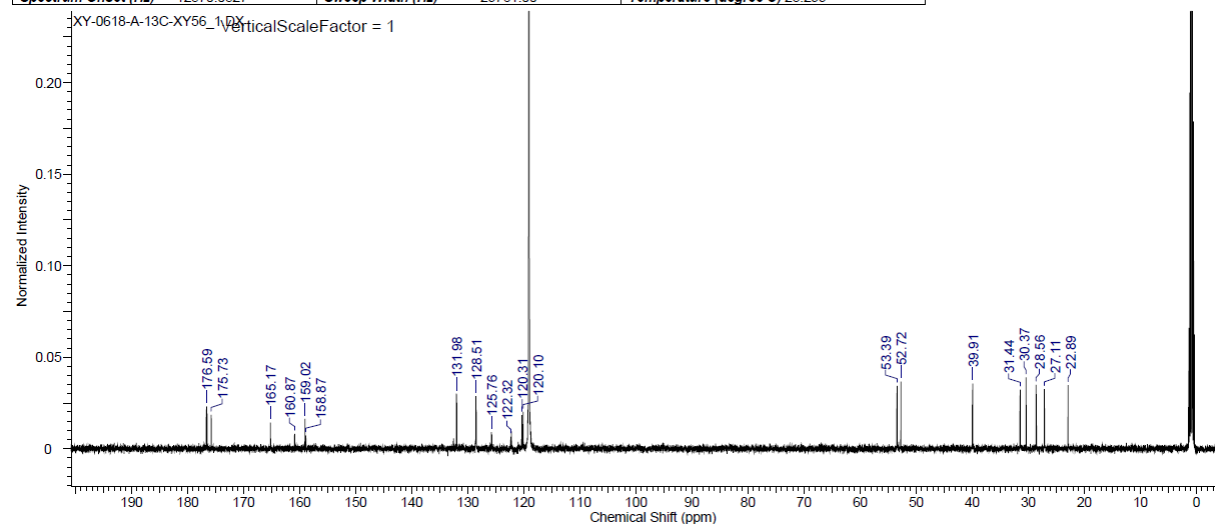

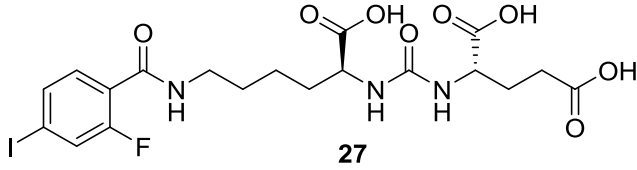

|                        |                      |                  |                                                                               |                        |                      |
|------------------------|----------------------|------------------|-------------------------------------------------------------------------------|------------------------|----------------------|
| Acquisition Time (sec) | 6.3615               | Comment          | 1H 1D CH3CN+D2O (C:\data\Martin Pomper) MP_xing 15                            | Date                   | 11 Jun 2014 16:15:45 |
| Date Stamp             | 11 Jun 2014 16:15:45 | File Name        | C:\USERS\XYANG45\JHU FILES\NMR\CARBAMATE CHARACTERIZATION\XY06112014-C-H 1.DX | Origin                 | MP_xing              |
| Frequency (MHz)        | 499.80               | Nucleus          | 1H                                                                            | Number of Transients   | 16                   |
| Original Points Count  | 65536                | Owner            | MP_xing                                                                       | Points Count           | 65536                |
| Spectrum Offset (Hz)   | 3113.4504            | Sweep Width (Hz) | 10302.04                                                                      | Temperature (degree C) | 23.299               |
|                        |                      | Solvent          | CH3CN+D2O                                                                     |                        |                      |

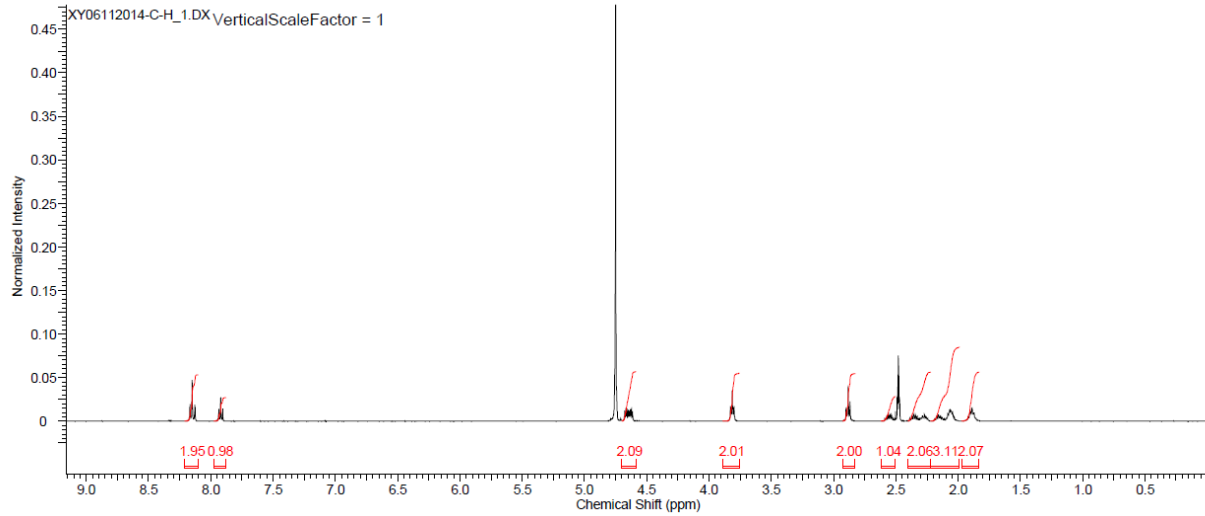

|                        |                      |                  |                                                                                 |                        |                      |
|------------------------|----------------------|------------------|---------------------------------------------------------------------------------|------------------------|----------------------|
| Acquisition Time (sec) | 1.1010               | Comment          | 13C 1D CH3CN+D2O (C:\data\Martin Pomper) MP_xing 16                             | Date                   | 11 Jun 2014 21:52:03 |
| Date Stamp             | 11 Jun 2014 21:52:03 | File Name        | C:\USERS\XYANG45\JHU FILES\NMR\CARBAMATE CHARACTERIZATION\XY06112014-C-13C 1.DX | Origin                 | MP_xing              |
| Frequency (MHz)        | 125.69               | Nucleus          | 13C                                                                             | Number of Transients   | 1024                 |
| Original Points Count  | 32768                | Owner            | MP_xing                                                                         | Points Count           | 32768                |
| Spectrum Offset (Hz)   | 12570.0527           | Sweep Width (Hz) | 29761.00                                                                        | Temperature (degree C) | 23.299               |
|                        |                      | Solvent          | CH3CN+D2O                                                                       |                        |                      |

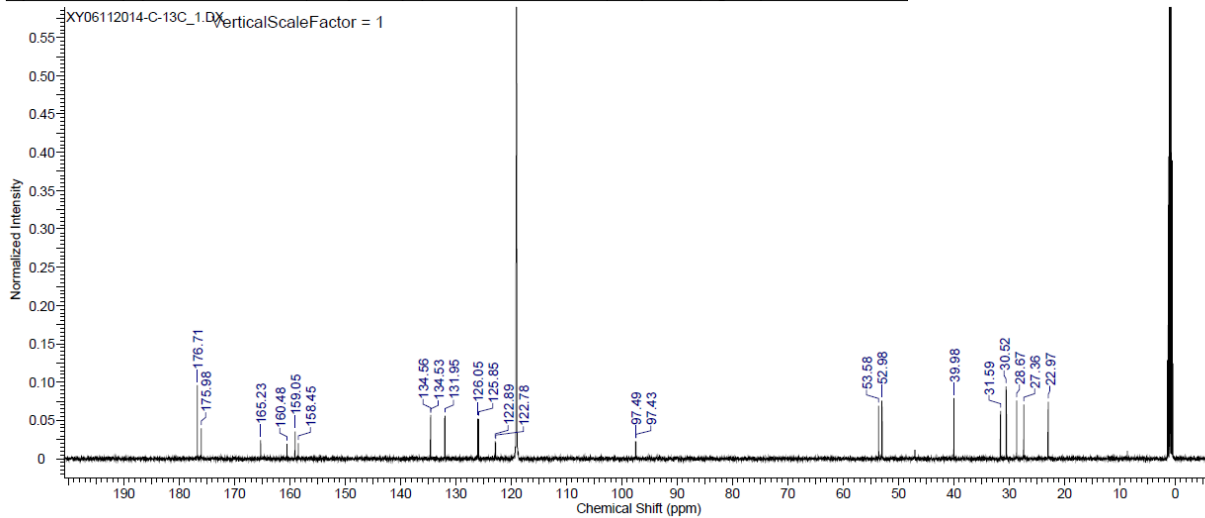

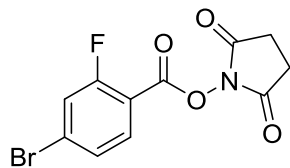

|                        |                      |                  |                                                          |                        |                      |
|------------------------|----------------------|------------------|----------------------------------------------------------|------------------------|----------------------|
| Acquisition Time (sec) | 6.3615               | Comment          | 1H 1D CDCl3 (C:\data\Martin_Pomper) MP_xing_15           | Date                   | 30 Mar 2015 12:50:48 |
| Date Stamp             | 30 Mar 2015 12:50:48 | File Name        | C:\USERS\XYANG45\JHU FILES\NMR\XY0330-A-BR_1-NHSESTER.DX | Origin                 | MP_xing              |
| Frequency (MHz)        | 499.80               | Nucleus          | 1H                                                       | Number of Transients   | 32                   |
| Original Points Count  | 65536                | Owner            | MP_xing                                                  | Points Count           | 65536                |
| Spectrum Offset (Hz)   | 3086.5986            | Sweep Width (Hz) | 10302.04                                                 | Temperature (degree C) | 21.496               |

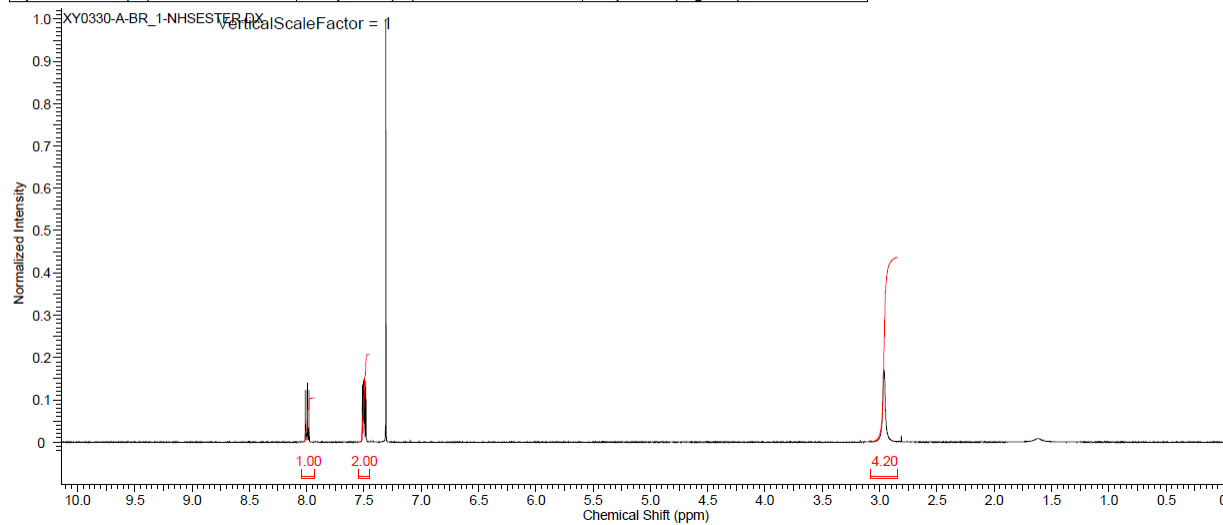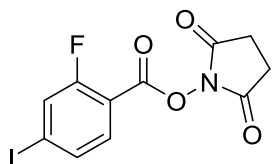

|                        |                      |                  |                                                         |                        |                      |
|------------------------|----------------------|------------------|---------------------------------------------------------|------------------------|----------------------|
| Acquisition Time (sec) | 6.3615               | Comment          | 1H 1D CDCl3 (C:\data\Martin_Pomper) MP_xing_16          | Date                   | 30 Mar 2015 12:55:51 |
| Date Stamp             | 30 Mar 2015 12:55:51 | File Name        | C:\USERS\XYANG45\JHU FILES\NMR\XY0330-B-I_1-NHSESTER.DX | Origin                 | MP_xing              |
| Frequency (MHz)        | 499.80               | Nucleus          | 1H                                                      | Number of Transients   | 32                   |
| Original Points Count  | 65536                | Owner            | MP_xing                                                 | Points Count           | 65536                |
| Spectrum Offset (Hz)   | 3029.0415            | Sweep Width (Hz) | 10302.04                                                | Temperature (degree C) | 21.496               |

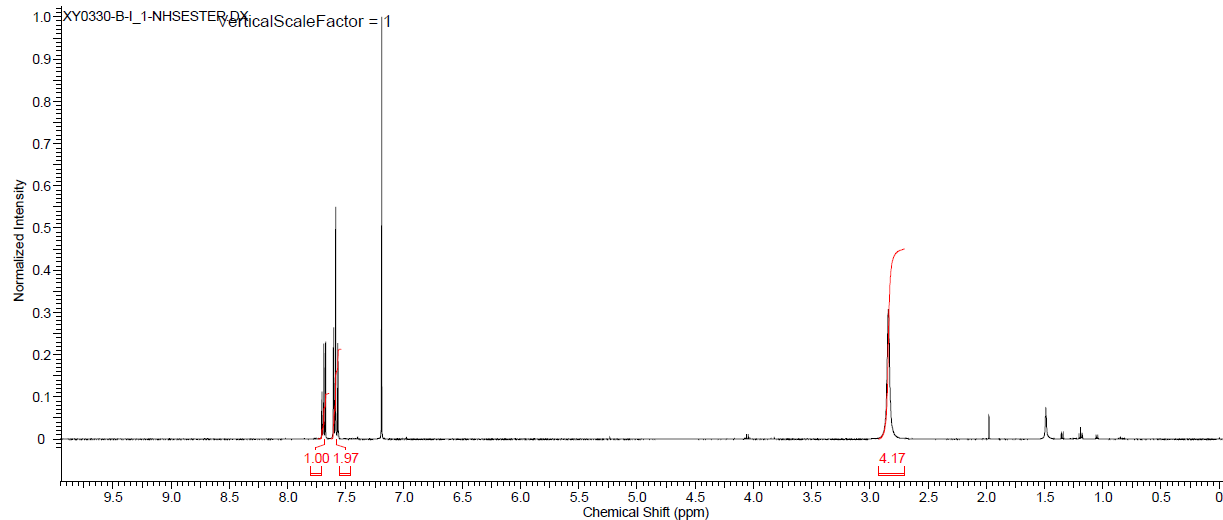



1. Dekker, B., Keen, H., Shaw, D., Disley, L. et al. Functional comparison of annexin V analogues labeled indirectly and directly with iodine-124. *Nucl. Med. Biol.* **2005**, 32, 403-413.
2. Banerjee, S.R, Pullambhatla, M., Foss, C.A., Nimmagadda, S. et al. <sup>64</sup>Cu-labeled inhibitors of prostate-specific membrane antigen for PET imaging of prostate cancer. *Journal of medicinal chemistry*, 2014, 57(6), 2657-69.
3. Tang, G., Zeng, W., Yu, M., Kabalka, G. Facile synthesis of N-succinimidyl-4-[<sup>18</sup>F]fluorobenzoate ([<sup>18</sup>F]SFB for protein labeling. *J Label Comp Radiopharm*, 2008, 51, 68-71.
